1

2 **NEW RESULTS**

3

4 **Genome-wide analysis of MIKC-type MADS-box genes in wheat: pervasive**  
5 **duplications may have facilitated adaptation to different environmental**  
6 **conditions**

7

8 *Susanne Schilling<sup>1</sup>, Alice Kennedy<sup>1,2</sup>, Sirui Pan<sup>1</sup>, Lars S. Jermin<sup>1,3</sup> and Rainer Melzer<sup>1\*</sup>*

9 <sup>1</sup>School of Biology and Environmental Science, University College Dublin, Ireland

10 <sup>2</sup>present address: Institute for Microbiology and Plant Biology, Katholieke Universiteit  
11 Leuven, Belgium

12 <sup>3</sup>Research School of Biology, Australian National University, Australia

13 \*corresponding author. Telephone: 00353 1 716 2290

14 Author emails:

15 [susanne.schilling@ucd.ie](mailto:susanne.schilling@ucd.ie)

16 [alice.kennedy@kuleuven.be](mailto:alice.kennedy@kuleuven.be)

17 [sirui.pan@ucdconnect.ie](mailto:sirui.pan@ucdconnect.ie)

18 [lars.jermin@anu.edu.au](mailto:lars.jermin@anu.edu.au)

19 [rainer.melzer@ucd.ie](mailto:rainer.melzer@ucd.ie)

20

21 Date of submission: 26.03.2019

22 Tables and Figures: 2 Tables, 6 Figures

23 Word count: ca. 5408

24 Running title: MIKC-type MADS-box genes in wheat

25 **Abstract**

26 **Background** Wheat (*Triticum aestivum*) is one of the most important crops  
27 worldwide. Given a growing global population coupled with increasingly challenging climate  
28 and cultivation conditions, facilitating wheat breeding by fine-tuning important traits such as  
29 stress resistance, yield and plant architecture is of great importance. Since they are involved  
30 in virtually all aspects of plant development and stress responses, prime candidates for  
31 improving these traits are MIKC-type (type II) MADS-box genes.

32 **Results** We present a detailed overview of number, phylogeny, and expression  
33 of 201 wheat MIKC-type MADS-box genes, which can be assigned to 15 subfamilies.  
34 Homoeolog retention is significantly above the average genome-wide retention rate for wheat  
35 genes, indicating that many MIKC-type homoeologs are functionally important and not  
36 redundant. Gene expression is generally in agreement with the expected subfamily-specific  
37 expression pattern, indicating broad conservation of function of MIKC-type genes during  
38 wheat evolution.

39 We find the extensive expansion of some MIKC-type subfamilies to be correlated with their  
40 chromosomal location and propose a link between MADS-box gene duplications and the  
41 adaptability of wheat. A number of MIKC-type genes encode for truncated proteins that lack  
42 either the DNA-binding or protein-protein interaction domain and occasionally show novel  
43 expression patterns, possibly pointing towards neofunctionalization.

44 **Conclusions** Conserved and neofunctionalized MIKC-type genes may have played  
45 an important role in the adaptation of wheat to a diversity of conditions, hence contributing to  
46 its importance as a global staple food. Therefore, we propose that MIKC-type MADS-box  
47 genes are especially well suited for targeted breeding approaches and phenotypic fine tuning.

48 **Keywords** MADS-box gene, MADS-domain, wheat, *Triticum aestivum*,  
49 transcription factors, IWGSC, gene duplication, neofunctionalization, crop breeding

## 50 **Background**

51 Bread wheat (*Triticum aestivum*) is one of the most important crops worldwide, contributing  
52 a significant amount of calories and proteins to the global human diet [1, 2]. Bread wheat is  
53 hexaploid and was first domesticated some 8 - 25,000 years ago in the region that today is  
54 called the middle-east [3, 4]. Wheat originated from three diploid progenitor species:  
55 *Triticum urartu* (A-genome donor), an *Aegilops speltoides*-related grass (B-genome donor)  
56 and *Aegilops tauschii* (D-genome donor) [5]. Because of its hexaploidy and an abundance of  
57 repetitive and transposable elements, bread wheat has one of the largest crop plant genomes  
58 (approximately 16 Gbp), making it challenging to work with from a genetics, genomics and  
59 breeding perspective [6]. However, recent advances in sequencing technology have led to a  
60 high-quality genome assembly and annotation by the International Wheat Genome  
61 Sequencing Consortium (IWGSC) [7]. Further, large scale RNA-seq analyses provided  
62 insights into expression patterns of homoeologous genes in different development stages and  
63 under a variety of stress conditions; building a rich resource for more detailed analyses [8].  
64 Transcription factors (TFs) are a major driver in evolution as well as in domestication and  
65 bear the potential for crop improvement and trait fine-tuning [9]. MADS-box genes constitute  
66 one of the largest families of plant TFs [10]. They can be divided into two phylogenetically  
67 distinct groups: type I and type II [11]. While the function of most type I MADS-box genes  
68 remains to be illuminated, several type II genes are key domestication genes in different  
69 eudicot and monocot crops (reviewed in [12]). Plant type II MADS-domain proteins possess  
70 a typical domain structure, which is composed of the MADS-, I-, K- and C-terminal domain  
71 [13]. The MADS-domain enables the DNA-binding, nuclear localization and dimerization of  
72 the TF [14, 15], while I- and K-domain facilitate dimerization and higher-order complex  
73 formation of two or more MADS-domain proteins [16, 17]. The C-terminal domain allows  
74 for transcriptional activation of some MADS-domain proteins [18]. Because of this

75 characteristic domain structure, type II genes are also referred to as MIKC-type MADS-box  
76 genes [13]. MIKC-type MADS-box genes are involved in virtually all aspects of plant  
77 development, including the root, flower, seed and embryo [19]. They have also been reported  
78 to be involved in different stress responses [20-22]. Thus, understanding MIKC-type MADS-  
79 box genes is important for understanding plant development, which is in turn crucial for plant  
80 breeding and crop improvement [23].

81 MIKC-type MADS-box genes have been phylogenetically and functionally characterized in a  
82 variety of model systems (*Arabidopsis* (*Arabidopsis thaliana*) and *Brachypodium distachyon*  
83 [24, 25]) as well as important crop plants (banana, rice, brassica, cotton [21, 26-28]).  
84 Individual wheat MIKC-type MADS-box genes have also been studied for almost two  
85 decades. The most prominent example is probably *VERNALIZATION1* (*VRN1*), an  
86 *APETALAI* (*API*)-like key regulator of flowering time as well as floral meristem  
87 determination [29-33] and one of the most important loci that distinguishes spring from  
88 winter wheat varieties [33]. Other wheat MADS-box genes have been implicated in the  
89 control of flowering time, ovule development and pistilloidy [34-37]. However, a detailed  
90 genome-wide phylogenetic and functional characterization of wheat MIKC-type MADS-box  
91 genes is still missing.

92 To better understand the dynamics of MIKC-type gene evolution in wheat and to facilitate  
93 future research on this important TF family, we provide a detailed overview of the number,  
94 phylogeny and expression of MIKC-type MADS-box genes in the recently released genome  
95 of *Triticum aestivum* [7]. We find a number of wheat MIKC-type subfamilies to be  
96 significantly larger than expected and suggest that extensive sub- and neofunctionalization in  
97 those subfamilies contributed to the global distribution of wheat.

98

## 99 **Results**

100

### 101 **The wheat genome contains 201 MIKC-type MADS-box genes**

102 A total of 439 coding sequences (including splice variants) were identified on the basis of the  
103 functional annotation (PFAM domains) in the recently released IWGSC wheat genome  
104 (Table S1) [7]. This dataset was simplified by keeping only one splice variant from each  
105 genomic locus for further analyses (Table S2). MIKC-type MADS-box genes were  
106 differentiated from type I MADS-box genes using a phylogenetic approach (Table S1 see  
107 Methods for details). An additional eight MIKC-type genes were identified using BLAST  
108 search. Altogether, we identified 201 MIKC-type (type II) MADS-box genes in wheat (Table  
109 1, Table S2). Because MIKC-type MADS-box gene nomenclature in wheat is currently not  
110 consistent, with several genes having several synonymous names, we renamed all genes  
111 according to their subfamily association (Table 1, Table S2, see Methods for details).

112 The domain structure of MIKC-type MADS-domain proteins is crucial for their function,  
113 MADS- and K-domain being indispensable for DNA-binding and protein complex formation,  
114 respectively [13], although genes encoding truncated proteins may act as dominant negative  
115 versions [38, 39]. A total of 164 out of 201 MIKC-type genes encoded for both, a MADS- as  
116 well as a K-domain, while 29 genes lacked a K-box (14 %) and 7 lacked a MADS-box (3 %)  
117 (Table 1, Table S2, Figure 1). One gene encoded for a MADS- and an SRP54-domain  
118 (*TaBS.8A, TraesCS4A01G044400LC*) (Figure S3B, Table S2).

119 For a number of genes, the predicted gene structures were very long (30 kb and above, Table  
120 S2). We confirmed mRNA transcripts spanning over especially long introns (ca. 29 kbp) for  
121 two selected genes from the *FLC*-clade using RT-PCR and Sanger sequencing (Figure S1).

122

123

124 **MIKC-type MADS-box genes belong to well-defined subfamilies**

125 A Maximum Likelihood phylogenetic tree of all MIKC-type MADS-box genes from  
126 *Arabidopsis thaliana*, rice (*Oryza sativa*) and wheat shows that the wheat genome retained all  
127 15 major grass MIKC-type MADS-box gene subfamilies: *API* (*SQUAMOSA* (*SQUA*)), *AP3*  
128 (*DEF* (*DEFICIENS*)), *PISTILLATA* (*PI*; *GLOBOSA* (*GLO*)), *AGAMOUS* (*AG*) /*SEEDSTICK*  
129 (*STK*), *AG-LIKE6* (*AGL6*), *AGL12*, *AGL17*, *BSISTER* (*BS*; *GNETUM GNEMON MADS13*,  
130 (*GGM13*)), *SUPPRESSOR OF CONSTANS1* (*SOCI*), *SHORT VEGETATIVE PHASE* (*SVP*;  
131 *StMADS11*), *MIKC\**, *OsMADS32*, *FLOWERING LOCUS C* (*FLC*), *SEPALLATA1*(*SEPI*)  
132 and *SEP3* (Figure 1, Figure S2) [40].

133 In many subclades, the gene phylogeny roughly followed species phylogeny; with the  
134 *Arabidopsis* genes displaying a sister-group relationship to the grass genes; and one or more  
135 rice MADS-box genes closely related to a triad of three wheat homoeologs (e.g. the *SVP*-,  
136 *AGL12*-, *OsMADS32*-, *MIKC\**, *API*- and *AG*-subclades (Figure 1)). The topology in other  
137 subclades is more complex, suggesting multiple duplication events, before and/or after  
138 polyploidization of wheat (e.g. *SOCI*- and *SEPI* subclades, Figure S3A). Especially *Bsister*-,  
139 *AGL17*- and *FLC*- subclades are significantly expanded in wheat compared to *Arabidopsis*  
140 and rice (Figure 1, Figure 2, Figure S3B-D).

141

142 **Wheat MIKC-type genes exhibit a high rate of homoeolog retention and gene**  
143 **duplication**

144 In many flowering plants, the number of MIKC-type MADS-box genes is between 40 and 70  
145 [41]. Rice and *Arabidopsis* for example, despite their phylogenetic distance, have a similar  
146 number of MIKC-type MADS-box genes (43 and 45, respectively) [24, 42, 43]. With 201  
147 genes, the total number of MIKC-type MADS-box genes in wheat is among the highest of  
148 hitherto characterized flowering plant species [27, 44, 45]. This is partly due to the hexaploid

149 nature of wheat. However, even when corrected for ploidy-level, the number of MIKC-type  
150 MADS-box genes in bread wheat was significantly higher than in rice ( $\approx 1.5$  fold higher,  $\chi^2$   
151 test  $p = 0.028$ , Figure 2A-D). Even when truncated genes lacking either a MADS-box or a K-  
152 box were excluded, the gene number was still higher than in rice ( $164/3=54.7 > 42$ ). This  
153 increase in number is mainly due to the gene count in four subfamilies (*SEPI*-, *AGL17*-,  
154 *FLC*- and *Bsister*-like genes) that are significantly larger than expected ( $\chi^2$  test  $p = 0.002$ ,  
155  $p \ll 0.001$ ,  $p \ll 0.001$ ,  $p \ll 0.001$ , respectively; Figure 2A-D). The remaining subclades  
156 showed the expected 3:1 ratio of wheat-to-rice genes; and some were below the expected  
157 ratio (Figure 2D). In some of the latter cases, wheat orthologs of rice genes could not be  
158 identified, indicating gene loss in the lineage leading to *Triticum* (e.g. *API*- and *AGL6*-like  
159 genes, Figure 1, Figure 2A-D).

160 To better understand why MIKC-type MADS-box genes are so abundant in the wheat  
161 genome, we analyzed homoeologous groups in detail (Table 2). Approximately one third of  
162 all wheat genes (i.e. all genes annotated in the current version of the wheat genome) are  
163 present in homoeologous groups of 3, also termed triads (1:1:1; 35.8 % of genes) [7]. In  
164 contrast, almost two thirds of the 201 MIKC-type genes identified are present in triads (62.7  
165 %, Table 2). If only ‘full-length’ MADS-box genes (defined here as containing a MADS- and  
166 K-box) are considered, this ratio is even higher (72.7 %, Table 2). Also, the percentage of  
167 MIKC-type genes with homoeolog-specific duplications is higher for MIKC-type genes as  
168 compared to all wheat genes (8.5 % vs. 5.7 % Table 2). Loss of one homoeolog, on the other  
169 hand, is less pronounced in MIKC-type genes (1 % vs. 13.2 %, Table 2). 38 genes were  
170 excluded from the analysis (18.9 %, 13 % for full-length only), because the relationship of  
171 the genes could not be reliably resolved. Thus, the high homoeolog retention rate can partly  
172 explain the high number of wheat MIKC-type genes.

173

174 In addition to this, a variety of duplication patterns were observed in some subfamilies  
175 (Figure S3, Supplementary Text 1). For example, the rice *SEPI*-like genes *OsMADS1* and  
176 *OsMADS5* are sister to 10 and 7 wheat genes, respectively. In this case, the phylogenetic  
177 analysis suggests gene duplications in the lineage leading to *Triticum* but before the  
178 polyploidization of wheat (Figure S3A). The *Bsister* gene *OsMADS30* from rice is sister to 27  
179 wheat genes, many of which lack a MADS- or K-box and are found in non-syntenic regions,  
180 indicating gene amplification occurred through transposable elements (Table 1, Figure S3B).  
181 For the *AGLI7*- and *FLC*-subfamily from wheat, a number of triads can be assigned to a  
182 single rice gene (Figure S3C, D). Several genes from these two subfamilies are found in close  
183 vicinity to each other, pointing towards tandem duplications as a mechanism for subfamily  
184 expansion (Table 1, Figures 2E and S2C, S2D).

185

186 **Gene duplications and truncated genes are prevalent among MIKC-type genes in**  
187 **subtelomeric segments**

188 MIKC-type MADS-box genes were generally equally distributed among the chromosomes,  
189 the only exception being the three homoeologous chromosomes 7, which contained  
190 significantly more genes than expected from the chromosome lengths ( $\chi^2$  test  $p \ll 0.001$ ,  
191 Figure 2E). This is mainly due to *AGLI7*-like genes; with the majority of them located in  
192 tandem locations on the distal subtelomeric ends of chromosomes 7 (Figure 2E, Table S2).  
193 Overall, MIKC-type genes were located equally likely in the more central segments of the  
194 chromosomes (R2a, R2b and C) and in the subtelomeric parts of the chromosomes (R1 and  
195 R3) (48 and 50 % of genes, respectively). However, gene location varied greatly among  
196 subfamilies (Figure 3). In general, genes belonging to smaller subfamilies tended to be  
197 located in more central segments of the chromosomes; whereas a larger percentage of genes  
198 belonging to more expanded subfamilies were located in subtelomeric segments (Figure 4,



199 Table S2). Further, full-length MIKC-type genes were about equally likely to be located  
200 within sub-telomeric versus central segments (45 % vs. 54 %, respectively), but truncated  
201 genes (MADS- or K-box only) were two times as prevalent in subtelomeric segments (61 %  
202 vs. 31 %; 8 % of genes were not assigned to a chromosome) (Figure 3A). Genes in  
203 subtelomeric segments were often found to be in close vicinity to each other, with over half  
204 of the genes in subtelomeric segment R1 being under 1000 kbp downstream of the closest  
205 MIKC-type gene (Table S3). In contrast, only 15 % of genes in the centromere segment have  
206 a distance under 1000 kb to the next downstream MIKC-type gene (Table S3). This might be  
207 due to more frequent tandem duplication events in subtelomeric segments. These findings are  
208 in line with the observation that subtelomeric segments are targets of recombination events  
209 and that many fast evolving genes lie within these segments [46].

210

### 211 **Conserved and divergent patterns of MIKC-type MADS-box gene expression during** 212 **wheat development**

213 To characterize the expression of wheat MIKC-type MADS-box genes, we analyzed RNA-  
214 seq data of 193 wheat MADS-box genes [8, 47]. Out of the 159 full-length genes, 83 % were  
215 expressed in at least one developmental stage, with a wide expression range with a maximum  
216 count of 1 to 424 transcripts per million ( $\text{tpm}_{\text{max}}$ ) (Figure 5, Table S2). The remaining 17 %  
217 of full-length genes showed a very low expression with a  $\text{tpm}_{\text{max}}$  below 1 (Figure 5A, Table  
218 S2). Of the 33 truncated genes, encoding only for either K or MADS-domain, 30 % were  
219 expressed (4 and 6 genes, respectively,  $\text{tpm}_{\text{max}}$  1 to 51; Figure 5A, Table S2). One gene,  
220 encoding for MADS- and an SRP54-domain was expressed ubiquitously in the plant, albeit at  
221 a low level (*TaBS.8A*;  $\text{tpm}_{\text{max}}$  3.12; Table S2, Figure S3).

222 In general, MADS-box genes expression patterns are comparable with findings in rice [21,  
223 48, 49] (Figure 5, Figure S4). MIKC\*-type genes are expressed in anthers (Figure 5A, Table

224 S7). Putative floral homeotic genes, such as *PI/AP3*-like and *AG/STK*-like genes,  
225 *OsMADS29*- and *OsMADS31*-like *Bsister* genes, *AGL6*-like genes as well as *SEPI* and *SEP3*-  
226 like genes are expressed specifically during flower and seed development (Figure 5). *AGL17*-  
227 like genes are expressed in roots. *API*-like, *SVP*-like and some *SEPI*-like genes are  
228 expressed ubiquitously throughout the plant life cycle in different tissues.

229 For further analysis, genes were hierarchically clustered according to expression similarities  
230 and then grouped into different expression modules (Figure 5B, Figure S4). This analysis  
231 showed that, genes from one subfamily could differ considerably in their expression pattern.  
232 For example, members of the *SEPI*-like gene subfamily are grouped into 6 different modules  
233 and *Bsister* genes are found in 5 different modules (Figure 5B). In contrast, *SVP*- and *API*-  
234 like genes show relatively little variation in their expression pattern (Figure 5B). It is also  
235 noteworthy that 79 genes including representatives from almost all subclades showed no  
236 expression or only low expression under very specific conditions during the developmental  
237 time course (41 % of genes; module 9; grey, Figure 5B).

238

### 239 ***AGL17*-like and *Bsister* genes are expressed in response to stress conditions**

240 *AGL17*- and *OsMADS30*-like *Bsister* clades have been expanding during wheat evolution  
241 (Figure 1, Figure 2). Many of the genes from these clades are not expressed or expressed on a  
242 very low level during wheat development (Figure 5). However, some of these genes do show  
243 expression in response to distinct stress conditions (Figures 6, S4).

244 *Bsister* genes form three distinct clades of *OsMADS29*- *OsMADS30*- and *OsMADS31*-like  
245 genes in grasses [50]. Most *Bsister* genes have been described to be important for ovule and  
246 seed development with a specific expression pattern limited to female reproductive organs  
247 [51-53]. While *OsMADS29*-like and *OsMADS31*-like wheat *Bsister* genes follow this  
248 conserved expression pattern (Figure 6A, *TaBS.1* and *TaBS.2*), some *OsMADS30*-like wheat

249 genes are expressed ubiquitously during the plant life cycle (Figure 6A, *TaBS.6B1*  
250 *TaBS.5A4*). In contrast, five closely related *OsMADS30*-like genes showed low or no  
251 expression in any of the developmental stages. Instead, a specific upregulation in response to  
252 inoculation with the pathogen *Fusarium graminearum* was detected (Figure 6A, *TaBS.4*;  
253 Figure S5).

254 *AGL17*-like genes are commonly expressed in roots and leaves [54]. They have also been  
255 described to be involved in osmotic and saline stress responses in rice [54]. Several wheat  
256 *AGL17*-like genes are not expressed at all during developmental stages (Figure 5, grey;  
257 Figure 6B). Two *AGL17*-like genes that are expressed in the root, but not in leaves under  
258 control conditions, show upregulation in leaf tissue after 1hour of heat stress (Figure 6B,  
259 genes 2,3). However, gene expression is not detectable after 6 h and there is no specific  
260 response to drought stress (Figure 6B, genes 2,3). Another *AGL17*-like gene is upregulated  
261 after 6h of heat, but not drought stress (Figure 6B, gene 4). A fifth *AGL17*-like gene is  
262 expressed in the root, and additionally upregulated in leaves in response to infection with  
263 stripe rust 7 days after infection (Figure 6C).

264

265 **Discussion**

266

267 **Many wheat MIKC-type MADS-box genes have evolutionarily conserved functions**

268 MIKC-type MADS-box genes play a central role in plant development. They are therefore  
269 promising targets for crop breeding and improvement [55].

270 Here, we identified 201 wheat MIKC-type MADS-box genes, which we assigned to 15  
271 conserved subfamilies (Table 1, Figure 1). At least 70 % of wheat MIKC-type MADS-box  
272 genes could be assigned to homoeologous groups with genes in every subgenome (Table 2).  
273 This is considerably above the average homoeologous retention rate in wheat (42 %, Table 2  
274 [7]). Many MADS-domain proteins act in multi-protein complexes [56]. The composition of  
275 those protein complexes changes dynamically during development, with many proteins being  
276 part of more than one complex [57, 58]. Changes in the gene dosage may result in changes in  
277 the stoichiometry of the protein complexes which may in turn have detrimental phenotypic  
278 effects [59]. Thus, selection may act to retain homoeologs in all subgenomes.

279 We also found that the expression pattern of many wheat MADS-box genes is similar to that  
280 of close homologs in rice and other model plants, indicating that gene functions are broadly  
281 conserved between wheat and rice.

282 Together, the conservation of all major subclades, the high homoeolog retention rate and the  
283 conservation of expression patterns underline the high biological importance of the MIKC-  
284 type MADS-box gene family in general and the distinct subclades in particular. Hence, the  
285 rich knowledge about the developmental role of MIKC-type MADS-box genes from model  
286 plants, combined with a complete picture of gene number, expression data and phylogenetic  
287 analyses in wheat will aid wheat breeding and improvement.

288

289 **Subfamily-specific expansion of wheat MIKC-type MADS-box genes may contribute to**  
290 **the high adaptability of wheat**

291 The hexaploid nature of wheat and the large size of the MADS-box gene family provide an  
292 ideal opportunity to study the evolutionary fate of genes after gene duplication and  
293 polyploidization.

294 With 201 genes, wheat has one of the largest MIKC-type MADS-box gene counts among  
295 flowering plants [27, 44, 45]. In total, wheat has about 3.1 times as many transcription factors  
296 as rice, which can generally be explained by its hexaploidy [60]. However, the number of  
297 MIKC-type MADS-box genes is more than 4.5 times higher in wheat than in rice (Figure 2A-  
298 D). The strikingly high number of MIKC-type MADS-box genes observed in this study is  
299 mainly due to – leaving hexaploidy aside – the significant expansion of four subclades: *SEPI*,  
300 *Bsister*, *AGL17* and *FLC* (Figure 2).

301 The expansion of MIKC-type subfamilies has been reported before in different plant species,  
302 such as for *SOCI*-like genes in *Eucalyptus* as well as *SVP*-like and *SOCI*-like genes in cotton  
303 [27, 45]. Intriguingly, genes from *FLC*-, *SVP*- and *SOCI*- subfamilies are involved in the  
304 control of flowering time [12, 61, 62]. It has been hypothesized that the expansion (and  
305 contraction) of developmental control genes, more specifically eudicot *FLC*-like genes,  
306 facilitate the rapid adaptation to changes in environmental factors such as temperature [63].  
307 In a similar manner, duplications of wheat *FLC*-like genes might have enabled the adaptation  
308 of wheat to different climatic conditions, therefore contributing to its global distribution. It  
309 will be interesting to see whether copy number variations of *FLC*-like genes can be detected  
310 in different wheat varieties.

311 The expansion of *Bsister* and *AGL17*-like genes may similarly be explained with an adaptive  
312 advantage. However, in those cases neofunctionalization might be involved. *Bsister* like  
313 genes form three subclades of *OsMADS29*-, *OsMADS30*- and *OsMADS31*-like genes in

314 grasses. Expression pattern and evolutionary analyses suggest that grass *OsMADS29*- and  
315 *OsMADS31*-like genes retain a conserved role in ovule and fruit development [48, 64],  
316 whereas *OsMADS30*-like genes may have functionally diverged [50]. For five wheat  
317 *OsMADS30*-like genes, upregulation was observed during infection with *Fusarium* head  
318 blight (*Fusarium graminearum*, Figure 6A). MIKC-type MADS-box genes are not typically  
319 associated with biotic stress responses and it remains speculative whether and how they  
320 might be involved in responding to a *Fusarium* infection. However, *Fusarium* head blight is a  
321 floral disease and *Bsister* genes are expressed in the flower. This may have facilitated a co-  
322 option of these genes into a pathogen response network. Interestingly, the lack of synteny  
323 between *OsMADS30*-like genes might point towards transposable elements as a possible  
324 duplication mechanism, underlining the evolutionary importance of transposable elements  
325 [65].

326 An upregulation in response to stresses was also observed for some *AGL17*-like genes, which  
327 form the largest wheat MIKC-type subfamily. While many wheat *AGL17*-like genes are not  
328 expressed (Figure 5), a number of them are upregulated in late stages of stripe rust infection  
329 and in response to heat stress (Figure 6B, C). Another three *AGL17*-like genes were found to  
330 be upregulated in some stages of anther and grain development, a pattern unusual for *AGL17*-  
331 like genes (Figure 5A). This diversity of expression patterns and putative functions adds to  
332 the complex evolution of *AGL17*-like genes, as genes from this subfamily have been  
333 implicated in various different functions including root development, flowering time control,  
334 tillering, stomata development and stress response [54, 66-69].

335 *OsMADS30*- and *AGL17*-like genes might be involved in other stress responses as well and  
336 might be good candidates to investigate cultivar-specific resistance to biotic and abiotic  
337 stresses.

338

### 339 **Dynamic evolution of MIKC-type MADS-box genes in subtelomeric regions**

340 The cause for the expansion of the *FLC*-, *AGL17*- *SEP1*- *OsMADS30*-like subfamilies might  
341 be the chromosomal position of their genes. Subtelomeric distal chromosome segments have  
342 been previously described as being targets of recombination events, and many fast evolving  
343 genes lie within these evolutionary hot spots [46, 70]. In wheat specifically, genes related to  
344 stress response and external stimuli, notably traits with a high requirement for adaptability,  
345 have been found to be located in distal chromosomal segments [7]. In contrast, genes related  
346 to photosynthesis, cell cycle or translation, e.g. genes with involved in highly conserved  
347 pathways are enriched in proximal chromosomal segments [7].

348 This notion is supported by our findings: genes of the larger wheat MIKC-type subclades  
349 tend to be located in subtelomeric segments (Figure 4, Figure 3). Remarkably, many of these  
350 expanded clades do control traits that are important for adaptation to different environments.  
351 For example, *AGL17*-like genes, are involved in root development and stress response and  
352 *FLC*-like genes, determine flowering time. On the other hand, smaller MIKC-type subclades  
353 involved in highly conserved developmental functions, such as *AP3/PI*- or *AG/STK*-like  
354 genes, which control reproductive organ identity, tend to be located more in central  
355 chromosomal segments (Figure 3). The higher prevalence of duplication events in  
356 subtelomeric chromosomal segments might thus have caused the expansion of certain  
357 subclades, possibly facilitating rapid adaptation to different environmental conditions. On the  
358 other hand, there might be an evolutionary advantage for wheat MIKC-type subclades with  
359 highly conserved functions to be located in proximal chromosomal positions: this way e.g.  
360 developmentally detrimental gene dosage variations are minimized.

361

362 The high prevalence of gene duplications in subtelomeric segments most likely also led to a  
363 higher proportion of truncated genes lacking either the MADS- or K-box (Figure 3A). This

364 might render the encoded protein functionally impaired, as suggested earlier for SEP1.2A  
365 (WLHS1A), which lacks a K-domain and shows no protein-protein interactions *in vivo* [71]  
366 (Figure 1, Table 1). However, MIKC-type MADS-domain proteins without a K-domain  
367 might theoretically still be able to bind DNA [13] and compete with full-length MIKC-type  
368 proteins for target sites, thus functioning as transcriptional inhibitors. On the other hand,  
369 genes lacking the MADS-box but encoding a K-domain might act in a dominant-negative  
370 manner by binding and sequestering other MADS-domain proteins [38, 39]. Evidence that  
371 dominant-negative versions of transcriptions factors can be evolutionary and developmentally  
372 important comes from basic helix-loop-helix proteins [72, 73]. We found *OsMADS30*-like  
373 wheat genes, encoding for only MADS, only K and an unusual combination of MADS and  
374 SRP54 domain expressed ubiquitously (Figures 5A, 6A), hence deviating from canonical  
375 *Bsister* expression in the flower and again hinting towards a possible neofunctionalization of  
376 *OsMADS30*-like genes during wheat evolution.

377

## 378 **Conclusions**

379 MIKC-type MADS-box genes are hugely important for wheat development and hence bear  
380 immense potential for the improvement of this economically highly relevant crop. Our data  
381 indicate that MADS-box gene duplications might have been crucial for increasing the  
382 adaptability of wheat to different environmental conditions as well as for fine-tuning  
383 quantitative traits by gene duplication. By thoroughly characterizing the entire complement of  
384 wheat MIKC-type MADS box genes, we provide the basis for the development of markers  
385 for future breeding efforts as well as for the identification of gene-editing targets to improve  
386 wheat performance. Further, we frequently observe possible neofunctionalization, a  
387 requirement for understanding the emergence of new traits during evolution.

388



## 389 **Methods**

390

### 391 **Sequence search and annotation of MIKC-type MADS-box genes**

392 Wheat coding sequence (CDSs) predictions, refmap comparison between IWGSC and The

393 Genome Analysis Centre (TGAC) and functional annotations of both, high and low

394 confidence (HC and LC) wheat genes, were downloaded from the IWGSC archive v1.0

395 ([https://urgi.versailles.inra.fr/download/iwgsc/IWGSC\\_RefSeq\\_Annotations/v1.0/](https://urgi.versailles.inra.fr/download/iwgsc/IWGSC_RefSeq_Annotations/v1.0/)) [7] and

396 the CSS - TGAC comparison was downloaded from

397 [https://opendata.earlham.ac.uk/opendata/data/Triticum\\_aestivum/TGAC/v1/annotation/](https://opendata.earlham.ac.uk/opendata/data/Triticum_aestivum/TGAC/v1/annotation/) [74].

398 Functional annotations were filtered for PFAM identifiers of the MADS- and K-domain

399 (PF00319 and PF01486), respectively [75]. A total of 439 sequences were identified (see a

400 list of all gene IDs in Table S1). Of these, 188 sequences had a MADS-box and a K-box (181

401 HC plus 7 LC), 240 sequences (159 HC plus 71 LC) had only a MADS-box; and 21 had only

402 a K- -box (16 HC plus 5 LC) (Table S1). Splice variants were excluded and only the first

403 variant was kept for further analysis, with three exceptions (see Table S2).

404 All CDSs were translated into amino acid sequences and aligned with all MADS-domain

405 protein sequences of rice (*Oryza sativa*, [21]) with MAFFT (L-INS-i algorithm) [76, 77]

406 using only the MADS-domain of each sequence. Subsequently, a phylogeny was generated

407 using IQTREE [78, 79]. This allowed distinguishing type I and type II (MIKC-type) MADS-

408 domain proteins (Table S1). All type I MADS-box CDSs were excluded from subsequent

409 analyses.

410 We evaluated the predicted gene structure of all genes, assuming a canonical M-I-K-C

411 domain structure. In cases where either MADS- or K-box were absent from gene predictions,

412 we compared the sequences with closely related rice and Arabidopsis genes, TGAC gene

413 predictions and screened the surrounding genomic regions using the NCBI conserved domain

414 database [80-83]. In 17 cases gene prediction was repeated with FGENESH+ or  
415 FGENESH\_C [84] using rice MADS-box genes of the same clade (Table S4). In one case  
416 (*TaAGL17.2A1*, *TraesCSU01G209900*), the TGAC CDS was used instead of IWGSC  
417 prediction, because it encoded for a canonical MIKC structure as compared to the IWGSC  
418 prediction, which comprised a MADS-box. This approach yielded 193 wheat MIKC-type  
419 MADS-box sequences.

420 In parallel, a BLAST search was carried out by which we identified 8 additional MIKC-type  
421 genes (Table S3) ([https://urgi.versailles.inra.fr/blast\\_iwgsc/](https://urgi.versailles.inra.fr/blast_iwgsc/)) [7, 85].

422 Altogether, a total of 201 wheat MIKC-type MADS-box genes were identified (Table 1,  
423 Table S2).

424

#### 425 **Maximum likelihood phylogeny of MIKC-type MADS-box genes**

426 Based on the first phylogeny, MIKC-type sequences were sorted into the major grass MIKC-  
427 type subfamilies (Table S2) [40]. Afterwards, subfamily alignments of MIKC-type protein  
428 sequences were created using wheat, rice and Arabidopsis protein sequences [24, 42, 43]  
429 using MAFFT (E-INS-i algorithm) [76, 77]. Subfamily alignments were then merged using  
430 MAFFT (E-INS-i algorithm;) [76, 77]. The full-length alignment of all MIKC-type MADS-  
431 domain proteins was analyzed with Homo (Version 1.3) [86] to confirm that the sequences  
432 met the phylogenetic assumption of reversible conditions. Individual residues were  
433 subsequently masked with Alistat (Version 1.3) [87], leaving only sites with a completeness  
434 score ( $C_c$ , defined as  $C_c = \text{Number of unambiguous characters in the column} / \text{number of}$   
435  $\text{sequences}$ ) above 0.5 (a total of 207 sites) (alignment in Supplementary Text 2).

436 Using the masked protein alignment, a phylogenetic tree was inferred under maximum  
437 likelihood with IQ-TREE [79]. The substitution model was calculated with ModelFinder  
438 (integrated in IQ-TREE; best-fit model: JTT+R5 chosen according to BIC) [78]. Consistency

439 of the phylogenetic estimate was evaluated with Ultra Fast bootstraps as well as SH-aLRT  
440 test (1000 replicates each) [88-90]. The resulting treefile was visualized with Geneious  
441 version 11.1 (<https://www.geneious.com>) (Figure 1) and FigTree version 1.4.4  
442 (<http://tree.bio.ed.ac.uk/software/figtree/>) (Figure S2).

443

#### 444 **Naming of MIKC-type MADS-box genes**

445 We suggest a consistent naming pattern for all MIKC-type wheat MADS-box genes, taking  
446 into account their subfamily association, phylogenetic relationships as well as their  
447 subgenome location (A, B or D). Each gene name starts with an abbreviation for the species  
448 name *Triticum aestivum* (*Ta*), followed by the name of the respective Arabidopsis subfamily  
449 (e.g. “*SEPI*” for *SEPALLATA1*-like genes, “*AGL6*” for *AGL6*-like genes or “*BS*” for *Bsister*  
450 genes). The gene names include an A, B or D, indicating the subgenome they are located in,  
451 e.g. *TaAGL6B*. If more than one triad of homoeologs was found in one subfamily, these were  
452 distinguished by a “.” and consecutive numbers, then followed by the subgenome (e.g.  
453 *TaAGL12.1A* and *TaAGL12.2A*). If more than one copy of a gene was present in one  
454 subgenome (inparalogs, e.g. due to tandem duplications or transposition), a number was  
455 added after the letter that indicates the subgenome (prevalent in *FLC*, *SEPI*, *AGL17* and  
456 *Bsister* subclades). Hence, the name of the gene with the ID TraesCS7B01G020900 is  
457 *TaSEPI.5B1* since it is a *SEPI*-like gene, and more precisely one of two inparalogs of the B  
458 genome (Figure 1, Table 1, all gene names listed in Table S2).

459

#### 460 **Identification of homoeologs**

461 Homoeologous genes were identified by phylogeny (Figure 1, Figure S3A-D). In some cases,  
462 where Ultra Fast bootstraps and SH-aLRT were not high enough to support a clade (above 90  
463 and 75, respectively), synteny and previous classifications were considered [8]. 38 genes

464 belonging to the *FLC*-, *Bsister* and *AGL17*-subclades were excluded from the analysis,  
465 because their homoeolog status could not definitely be determined (Table 1, Table 2, Figure  
466 S3).

467

#### 468 **Plant cultivation, RNA isolation and RT-PCR**

469 *Triticum turgidum* cv. Kronos (tetraploid) was used for RT-PCR analysis. Plants were grown  
470 in a greenhouse with no additional lighting at an ambient temperature of 20 to 24 °C until  
471 heading stage. RNA was extracted from the frozen flag leaf tip using QIAGEN<sup>®</sup> RNeasy  
472 Mini Kit according to manufacturer's instructions. cDNA was generated with Superscript IV<sup>®</sup>  
473 Reverse Transcriptase Kit using an oligo dT primer. RT-PCR was carried out with Thermo  
474 Scientific<sup>™</sup> Phusion High-Fidelity DNA Polymerase. Primer sequences are listed in  
475 Table S5.

476

#### 477 **Expression analysis of MIKC-type MADS-box genes using RNA-seq**

478 RNA-seq data of 193 wheat MADS-box genes was analyzed using  
479 [www.wheatexpression.com](http://www.wheatexpression.com) and [http://bar.utoronto.ca/efp\\_wheat/](http://bar.utoronto.ca/efp_wheat/) [8]. For the remaining 8  
480 genes, which were identified by BLAST, no expression data was available. Developmental  
481 stages depicted in Figure 5 refer to 70 tissues/time points from spring wheat cv. Azhurnaya  
482 [8]. Expression levels were downloaded from [www.wheatexpression.com](http://www.wheatexpression.com) as log<sub>2</sub>tpm and a  
483 heatmap was generated with heatmapper ([heatmapper.ca/expression](http://heatmapper.ca/expression)) [91]. Clustering was  
484 performed with heatmapper using centroid linkage with euclidean distance measure. All  
485 genes, modules and tissues are listed in Tables S6 and S7.

## **Declarations**

### **Ethics approval and consent to participate**

Not applicable

### **Consent for publication**

Not applicable

### **Availability of data and material**

Not applicable

### **Competing interests**

The authors declare that they have no competing interests.

### **Funding**

We are grateful to the School of Biology and Environmental Science at the University College Dublin for general support.

### **Authors' contributions**

RM and SS developed the analysis approach. SS and AK analyzed the data with supervision from RM and LJ. SP performed the RT-PCR experiments. SS and RM wrote the manuscript. All authors read and approved the final manuscript.

### **Acknowledgements**

We are grateful for the support by the International Wheat Genome Sequencing Consortium and early access to the genome data.

## Figures

**Figure 1. Maximum likelihood phylogeny of MIKC-type MADS-domain proteins from bread wheat, rice and Arabidopsis.** A phylogenetic tree of MADS-domain proteins from bread wheat, cultivated rice and Arabidopsis was inferred using IQ-TREE [78, 79]. Wheat genes are coloured, rice and Arabidopsis genes are in black. The Arabidopsis genes *AGL15* and *AGL18* were included in the phylogeny; however, the *AGL15*-subfamily is lost in the grass lineage [40], therefore no rice or wheat gene clustered with them. *OsMADS32*-like genes are monocot specific [40], hence in this clade there is no Arabidopsis gene. SH-aLRT and Ultrafast bootstrap values are indicated on the branches in %, values equal to 100 are designated by a -. Accession numbers of all wheat genes can be found in Table S2, a version of the tree with untransformed branches can be found in Figure S2. The tree is unrooted, the MIKC\* subclade was set as the outgroup.

**Figure 2. Number and location of MIKC-type genes.** The number of MADS-box genes identified per MIKC-type subfamily in Arabidopsis (A), rice (B) and wheat (C) [21, 24]. The ratio of MIKC-type gene numbers total and in all subfamilies is shown for wheat to rice (black) and wheat to Arabidopsis (grey) (D). In (D) the expected ratio (3:1) is indicated by a red line, asterisks mark significant deviation from expected value ( $\chi^2$  test,  $p < 0.05$ ).

All MIKC-type MADS-box genes were mapped to their respective locus in the wheat genome in a circular diagram using shinyCircos [92] (E). Subgenomes are indicated by different shades of blue (outer track), chromosomal segments are indicated by shades of grey (inner track) [7]. Homoeologous genes were inferred by mainly by phylogeny (details see Methods) and linked with subfamily-specific colors (inside of circle).

**Figure 3. Chromosomal distribution of wheat MIKC-type MADS-box genes.** The proportion of truncated (black) and full-length (white) MIKC-type genes in every chromosome segment is shown in a bar diagram (A). A schematic overview of the chromosome indicates the different segments, R1 and R3 (dark grey), R2A and R2B (light grey) and C (white) (B). The location of all genes belonging to each MIKC-type subfamily is shown as percentage of chromosome length (C). Segments have been averaged over all chromosomes, segment lengths according to [7].

**Figure 4. Distribution of MIKC-type genes to subtelomeric or central chromosome segments.** The number of genes per MIKC-type subclade was plotted against the fraction of genes located in central chromosome segments (R2a, R2b and C) and subtelomeric segments (R1 and R3). Subclades are indicated next to data points. Data points for some subfamilies are identical (*AGL6* and *OsMADS32*; *SVP* and *API*; *PI*, *AP3* and *AGL12*; *SEP3* and *MIKC\**).

**Figure 5. Expression of MIKC-type MADS-box genes during wheat development.** Expression analysis was done for all subfamilies using RNA-seq data [8]. A heatmap shows expression level of all genes in different subfamilies (columns) and stages/tissues (rows) (A). Genes and tissues are listed in Tables S6 and S7, respectively.

Genes were clustered into different modules according to their expression and mapped to subfamilies. Colors indicate different modules: shades of brown indicate ubiquitous expression, shades of green indicate expression in the root, shades of blue indicate expression in reproductive organs and grey indicates low or no expression during development (B). The digits inside the circles indicate the number of genes in the respective module. The clustering heatmap with all modules can be found in Figure S4. A schematic representation of a wheat plant depicts colors indicating different expression modules (C).

**Figure 6. Expression of *Bsister* and *AGL17*-like genes in response to stress conditions.**

RNA-seq data was analyzed using wheatexpression.com [47]. *Bsister* gene expression in different tissues [8] and in response to infection with *Fusarium* head blight [93] (A). Expression of wheat *OsMADS31*-like genes (*TaBS.2*) *OsMADS29*-like genes (*TaBS.1*) and *OsMADS30*-like genes (*TaBS.4*, *TaBS.5A4*, *TaBS.6B1*) in root, stem and grain [8] as well as spikelets during mock inoculation and infection with *Fusarium graminearum* after different time points is shown as a heatmap.

*AGL17*-like gene (1-4) expression in roots and seedling leaves under control conditions (c) and after 1 and 6 hours of drought (d), heat (h) and combined drought and heat stress (dh) [94] (B).

Expression of *TaAGL17.3D* within different root tissues [8] and in leaves under control conditions and after infection with stripe rust (*Puccinia striiformis*) [95] is shown as a bar diagram. SEM is indicated as error bars. Data is shown as log<sub>2</sub>tpm (A, B) or as tpm (C).

**Tables**

**Table 1. Subfamilies, names and numbers of wheat MIKC-type MADS-box genes.**

A complete list of all wheat MIKC-type genes can be found in Table S2.

<sup>1</sup> asterisk indicates that the number of homeologs could not be determined due to insufficient phylogenetic resolution, genes were not included into homoeolog count (Table 2). Details see Figure S3.

<sup>2</sup> gene encodes for MADS but not K domain

<sup>3</sup> gene encodes for K but not MADS domain



<sup>4</sup> number in parentheses indicates a different chromosome for one of the genes; x, genes located on more than two different chromosomes

<sup>5</sup> parentheses indicate truncated genes, encoding for either MADS or K domain

## **Table 2. Groups of homoeologous MIKC-type MADS-box genes in wheat.**

<sup>1</sup> according to [7]

<sup>2</sup> % calculated with 201 genes

<sup>3</sup> % calculated with 164 genes

<sup>4</sup> either n:1:n or 0:1:n

<sup>5</sup> see Table 1 and Figure S3

## **Supplementary Material**

### **Supplementary Figures**

**Figure S1. RT-PCR of two FLC-like wheat genes.** Schematic representation of two FLC genes and primer binding sites (red arrowheads) (A). Intron size is indicated by dotted line, boxes indicate exons, lines indicates introns. Gel images of PCR products and expected fragment sizes (B). The sequence of the PCR products was verified using Sanger Sequencing.

**Figure S2. Maximum likelihood phylogeny of MIKC-type MADS-domain proteins from bread wheat, rice and Arabidopsis, branches not transformed.** SH-aLRT and Ultrafast bootstrap values are indicated on the branches in %, values equal to 100 are designated by a -. The tree is unrooted, the MIKC\* subclade was set as the outgroup.

**Figure S3. Maximum likelihood phylogenies of four different MIKC-type subfamilies.**

Subphylogenies of *SEPALLATA*- (A), *Bsister*- (B), *AGL17*- (C) and *FLC*- (D) like genes from Arabidopsis, rice and wheat were generated using protein alignments and IQ-TREE [78, 79]. *AGL6*- (A), *AP3/PI*-(B) and *OsMADS32*- (C, D)-like genes were used as an outgroup. Red and blue triangles indicate truncated genes encoding only for MADS- and K-domain, respectively. Black circle indicates gene encoding for a MADS- and SRP54-domain (PF00448). Groups excluded from homoeolog analysis are indicated by asterisks.

**Figure S4. Cluster expression analysis of wheat MIKC-type MADS-box genes during developmental stages.** Expression analysis was done for all wheat MIKC-type genes and tissue using RNA-seq data from wheatexpression.com [8, 47]. A heatmap shows expression levels of all genes in different subfamilies (rows) and stages/tissues (columns). Genes and tissues are listed in Tables S6 and S7, respectively. Heatmap and clustering was done with heatmapmer.com and a cladogram showing the result of the clustering is shown on the left. Modules 1 to 17 were assigned and borders indicated by red lines (right). Values represent  $\log_2$ tpm.

**Figure S5. Expression of wheat *Bsister* genes during Fusarium head blight infection.**

RNA-seq data was analyzed using wheatexpression.com [8, 47]. *Bsister* gene expression in the donor plant and 4 near-isogenic lines (NIL) under control conditions (c) and *Fusarium graminearum* inoculation (s) (30 and 50 h) is shown as a heatmap [96]. Values represent  $\log_2$ tpm.

## Supplementary Tables

**Table S1. List of all sequences identified by PFAM domain (type I and type II).**

**Table S2. List of all MIKC-type MADS-box genes in wheat.**

<sup>1</sup> (+) indicates FLC-specific K-box (not PFAM PF01486); (-) TGAC version of this gene does have PF01486, IWGSC does not have PF01486

<sup>2</sup> Protein length and molecular weight were determined with the protein molecular weight function on bioinformatics.org using conceptually translated CDS.

<sup>3</sup> According to [97]

<sup>4</sup> According to [8]

<sup>5</sup> TGAC identifiers were inferred from refmap comparison between IWGSC and TGAC [7] (details see Methods)

<sup>6</sup> identifiers were inferred from refmap comparison between CSS - TGAC [74] (details see Methods)

**Table S3. Average distance to the nearest downstream MIKC-type gene in kbp in different chromosomal segments.** Distances between start points of neighboring MIKC-type genes have been calculated and averaged over chromosomal segments.

**Table S4. List of all MIKC-type MADS-box genes predicted during this study.** Table includes gene name, IWGSC identifier (if available) and chromosome location, PFAM domain(s), predicted coding sequence and prediction algorithm and guiding sequence. FGENESH+ and FGENESH\_C predictions are guided by homolog protein or cDNA sequences, respectively.

**Table S5. Primer sequences for RT-PCR.**

**Table S6. Expression modules and gene numbers for Figure 5A and S3.**

**Table S7. Tissues for expression analysis for Figure 5A and S3.**

## References

- 486 1. Shiferaw B, Smale M, Braun H-J, Duveiller E, Reynolds M, Muricho G: **Crops that feed**  
487 **the world 10. Past successes and future challenges to the role played by wheat in**  
488 **global food security.** *Food Security* 2013, **5**:291-317.
- 489 2. Veraverbeke WS, Delcour JA: **Wheat protein composition and properties of wheat**  
490 **glutenin in relation to breadmaking functionality.** *Critical reviews in food science*  
491 *and nutrition* 2002, **42**:179-208.
- 492 3. Allaby RG, Stevens C, Lucas L, Maeda O, Fuller DQ: **Geographic mosaics and**  
493 **changing rates of cereal domestication.** *Philosophical Transactions of the Royal*  
494 *Society B: Biological Sciences* 2017, **372**:20160429.
- 495 4. Smith BD, Nesbitt M: *The emergence of agriculture.* Scientific American Library New  
496 York; 1995.
- 497 5. Shewry PR: **Wheat.** *Journal of experimental botany* 2009, **60**:1537-1553.
- 498 6. Borrill P, Adamski N, Uauy C: **Genomics as the key to unlocking the polyploid**  
499 **potential of wheat.** *New Phytol* 2015, **208**:1008-1022.
- 500 7. Appels R, Eversole K, Feuillet C, Keller B, Rogers J, Stein N, Pozniak CJ, Choulet F,  
501 Distelfeld A, Poland J: **Shifting the limits in wheat research and breeding using a**  
502 **fully annotated reference genome.** *Science* 2018, **361**:eaar7191.
- 503 8. Ramírez-González R, Borrill P, Lang D, Harrington S, Brinton J, Venturini L, Davey M,  
504 Jacobs J, Van Ex F, Pasha A: **The transcriptional landscape of polyploid wheat.**  
505 *Science* 2018, **361**:eaar6089.
- 506 9. Martínez-Ainsworth NE, Tenaillon MI: **Superheroes and masterminds of plant**  
507 **domestication.** *Comptes Rendus Biologies* 2016, **339**:268-273.
- 508 10. Riechmann JL, Heard J, Martin G, Reuber L, Jiang CZ, Keddie J, Adam L, Pineda O,  
509 Ratcliffe OJ, Samaha RR, et al: **Arabidopsis transcription factors: Genome-wide**  
510 **comparative analysis among eukaryotes.** *Science* 2000, **290**:2105-2110.
- 511 11. Alvarez-Buylla ER, Pelaz S, Liljegren SJ, Gold SE, Burgeff C, Ditta GS, de Pouplana LR,  
512 Martínez-Castilla L, Yanofsky MF: **An ancestral MADS-box gene duplication occurred**  
513 **before the divergence of plants and animals.** *PNAS* 2000, **97**:5328-5333.
- 514 12. Schilling S, Pan S, Kennedy A, Melzer R: **MADS-box genes and crop domestication:**  
515 **the jack of all traits.** *J Exp Bot* 2018, **69**:1447-1469.
- 516 13. Kaufmann K, Melzer R, Theissen G: **MIKC-type MADS-domain proteins: structural**  
517 **modularity, protein interactions and network evolution in land plants.** *Gene* 2005,  
518 **347**:183-198.
- 519 14. Riechmann JL, Wang M, Meyerowitz EM: **DNA-binding properties of Arabidopsis**  
520 **MADS domain homeotic proteins APETALA1, APETALA3, PISTILLATA and**  
521 **AGAMOUS.** *Nucleic Acids Research* 1996, **24**:3134-3141.
- 522 15. Immink RG, Gadella TW, Ferrario S, Busscher M, Angenent GC: **Analysis of MADS box**  
523 **protein–protein interactions in living plant cells.** *Proceedings of the National*  
524 *Academy of Sciences* 2002, **99**:2416-2421.
- 525 16. Melzer R, Verelst W, Theissen G: **The class E floral homeotic protein SEPALLATA3 is**  
526 **sufficient to loop DNA in ‘floral quartet’-like complexes in vitro.** *Nucleic Acids*  
527 *Research* 2008, **37**:144-157.
- 528 17. Yang Y, Jack T: **Defining subdomains of the K domain important for protein–protein**  
529 **interactions of plant MADS proteins.** *Plant molecular biology* 2004, **55**:45-59.

- 530 18. Honma T, Goto K: **Complexes of MADS-box proteins are sufficient to convert leaves**  
531 **into floral organs.** *Nature* 2001, **409**:525-529.
- 532 19. Gramzow L, Theissen G: **A hitchhiker's guide to the MADS world of plants.** *Genome*  
533 *biology* 2010, **11**:214.
- 534 20. Jia J, Zhao P, Cheng L, Yuan G, Yang W, Liu S, Chen S, Qi D, Liu G, Li X: **MADS-box**  
535 **family genes in sheepgrass and their involvement in abiotic stress responses.** *BMC*  
536 *plant biology* 2018, **18**:42.
- 537 21. Arora R, Agarwal P, Ray S, Singh AK, Singh VP, Tyagi AK: **MADS-box gene family in**  
538 **rice: genome-wide identification, organization and expression profiling during**  
539 **reproductive development and stress.** *BMC Genomics* 2007, **8**.
- 540 22. Wei M, Wang Y, Pan R, Li W: **Genome-Wide Identification and Characterization of**  
541 **MADS-box Family Genes Related to Floral Organ Development and Stress**  
542 **Resistance in Hevea brasiliensis Müll. Arg.** *Forests* 2018, **9**:304.
- 543 23. Boden SA, Østergaard L: **How can developmental biology help feed a growing**  
544 **population?** *Development* 2019, **146**:dev172965.
- 545 24. Parenicova L, de Folter S, Kieffer M, Horner DS, Favalli C, Busscher J, Cook HE, Ingram  
546 RM, Kater MM, Davies B, et al: **Molecular and phylogenetic analyses of the**  
547 **complete MADS-box transcription factor family in Arabidopsis: New openings to**  
548 **the MADS world.** *Plant Cell* 2003, **15**:1538-1551.
- 549 25. Wei B, Zhang R-Z, Guo J-J, Liu D-M, Li A-L, Fan R-C, Mao L, Zhang X-Q: **Genome-wide**  
550 **analysis of the MADS-box gene family in Brachypodium distachyon.** *PLoS One* 2014,  
551 **9**:e84781.
- 552 26. Duan W, Song X, Liu T, Huang Z, Ren J, Hou X, Li Y: **Genome-wide analysis of the**  
553 **MADS-box gene family in Brassica rapa (Chinese cabbage).** *MGG* 2015, **290**:239-  
554 255.
- 555 27. Nardeli SM, Artico S, Aoyagi GM, de Moura SM, da Franca Silva T, Grossi-de-Sa MF,  
556 Romanel E, Alves-Ferreira M: **Genome-wide analysis of the MADS-box gene family**  
557 **in polyploid cotton (Gossypium hirsutum) and in its diploid parental species**  
558 **(Gossypium arboreum and Gossypium raimondii).** *Plant Physiol Biochem* 2018,  
559 **127**:169-184.
- 560 28. Liu J, Zhang J, Zhang J, Miao H, Wang J, Gao P, Hu W, Jia C, Wang Z, Xu B: **Genome-**  
561 **wide analysis of banana MADS-box family closely related to fruit development and**  
562 **ripening.** *Scientific reports* 2017, **7**:3467.
- 563 29. Li C, Lin H, Chen A, Lau M, Jernstedt J, Dubcovsky J: **Wheat VRN1 and FUL2 play**  
564 **critical and redundant roles in spikelet meristem identity and spike determinacy.**  
565 *bioRxiv* 2019:510388.
- 566 30. Murai K, Miyamae M, Kato H, Takumi S, Ogihara Y: **WAP1, a wheat APETALA1**  
567 **homolog, plays a central role in the phase transition from vegetative to**  
568 **reproductive growth.** *Plant Cell Physiol* 2003, **44**:1255-1265.
- 569 31. Harris F, Eagles H, Virgona J, Martin P, Condon J, Angus J: **Effect of VRN1 and PPD1**  
570 **genes on anthesis date and wheat growth.** *Crop and Pasture Science* 2017, **68**:195-  
571 201.
- 572 32. Trevaskis B, Bagnall DJ, Ellis MH, Peacock WJ, Dennis ES: **MADS box genes control**  
573 **vernalization-induced flowering in cereals.** *PNAS* 2003, **100**:13099-13104.
- 574 33. Yan L, Loukoianov A, Tranquilli G, Helguera M, Fahima T, Dubcovsky J: **Positional**  
575 **cloning of the wheat vernalization gene VRN1.** *PNAS* 2003, **100**:6263-6268.

- 576 34. Yamada K, Saraike T, Shitsukawa N, Hirabayashi C, Takumi S, Murai K: **Class D and B-**  
577 **sister MADS-box genes are associated with ectopic ovule formation in the pistil-**  
578 **like stamens of alloplasmic wheat (*Triticum aestivum* L.).** *Plant Mol Biol* 2009, **71**:1-  
579 14.
- 580 35. Yang W, Lou X, Li J, Pu M, Mirbahar AA, Liu D, Sun J, Zhan K, He L, Zhang A: **Cloning**  
581 **and functional analysis of MADS-box genes, TaAG-A and TaAG-B, from a wheat K-**  
582 **type cytoplasmic male sterile line.** *Frontiers in plant science* 2017, **8**:1081.
- 583 36. Meguro A, Takumi S, Ogiwara Y, Murai K: **WAG, a wheat AGAMOUS homolog, is**  
584 **associated with development of pistil-like stamens in alloplasmic wheats.** *Sexual*  
585 *Plant Reproduction* 2003, **15**:221-230.
- 586 37. Zhao XY, Cheng ZJ, Zhang XS: **Overexpression of TaMADS1, a SEPALLATA-like gene**  
587 **in wheat, causes early flowering and the abnormal development of floral organs in**  
588 **Arabidopsis.** *Planta* 2006, **223**.
- 589 38. Ferrario S, Busscher J, Franken J, Gerats T, Vandenbussche M, Angenent GC, Immink  
590 RG: **Ectopic expression of the petunia MADS box gene UNSHAVEN accelerates**  
591 **flowering and confers leaf-like characteristics to floral organs in a dominant-**  
592 **negative manner.** *The Plant Cell* 2004, **16**:1490-1505.
- 593 39. Seo PJ, Hong SY, Ryu JY, Jeong EY, Kim SG, Baldwin IT, Park CM: **Targeted**  
594 **inactivation of transcription factors by overexpression of their truncated forms in**  
595 **plants.** *The Plant Journal* 2012, **72**:162-172.
- 596 40. Gramzow L, Theissen G: **Phylogenomics reveals surprising sets of essential and**  
597 **dispensable clades of MIKC -group MADS-box genes in flowering plants.** *J Exp Zool*  
598 *B* 2015, **324**:353-362.
- 599 41. Gramzow L, Theißen G: **Phylogenomics of MADS-box genes in plants - Two**  
600 **opposing life styles in one gene family.** *Biology (Basel)* 2013, **2**.
- 601 42. Arora R, Agarwal P, Ray S, Singh AK, Singh VP, Tyagi AK, Kapoor S: **MADS-box gene**  
602 **family in rice: genome-wide identification, organization and expression profiling**  
603 **during reproductive development and stress.** *Bmc Genomics* 2007, **8**.
- 604 43. Verelst W, Saedler H, Münster T: **MIKC\* MADS-protein complexes bind motifs**  
605 **enriched in the proximal region of late pollen-specific Arabidopsis promoters.** *Plant*  
606 *Physiol* 2007, **143**:447-460.
- 607 44. Gramzow L, Theißen G: **Phylogenomics of MADS-box genes in plants—two**  
608 **opposing life styles in one gene family.** *Biology* 2013, **2**:1150-1164.
- 609 45. Vining KJ, Romanel E, Jones RC, Klocko A, Alves - Ferreira M, Hefer CA, Amarasinghe  
610 V, Dharmawardhana P, Naithani S, Ranik M: **The floral transcriptome of *Eucalyptus***  
611 **grandis.** *New Phytologist* 2015, **206**:1406-1422.
- 612 46. Chen NW, Thareau V, Ribeiro T, Magdelenat G, Ashfield T, Innes RW, Pedrosa-  
613 Harand A, Geffroy V: **Common bean subtelomeres are hot spots of recombination**  
614 **and favor resistance gene evolution.** *Frontiers in plant science* 2018, **9**.
- 615 47. Borrill P, Ramirez-Gonzalez R, Uauy C: **expVIP: a customizable RNA-seq data analysis**  
616 **and visualization platform.** *Plant Physiol* 2016, **170**:2172-2186.
- 617 48. Yang X, Wu F, Lin X, Du X, Chong K, Gramzow L, Schilling S, Becker A, Theißen G,  
618 Meng Z: **Live and let die-the Bsister MADS-box gene OsMADS29 controls the**  
619 **degeneration of cells in maternal tissues during seed development of rice (*Oryza***  
620 **sativa).** *PLoS one* 2012, **7**:e51435.

- 621 49. Liu Y, Cui S, Wu F, Yan S, Lin X, Du X, Chong K, Schilling S, Theißen G, Meng Z:  
622 **Functional conservation of MIKC\*-Type MADS box genes in Arabidopsis and rice**  
623 **pollen maturation.** *The Plant Cell* 2013, **25**:1288-1303.
- 624 50. Schilling S, Gramzow L, Lobbes D, Kirbis A, Weilandt L, Hoffmeier A, Junker A,  
625 Weigelt-Fischer K, Klukas C, Wu F, et al: **Non-canonical structure, function and**  
626 **phylogeny of the Bsister MADS-box gene OsMADS30 of rice (*Oryza sativa*).** *Plant J*  
627 2015:in press.
- 628 51. Becker A, Theißen G: **The major clades of MADS-box genes and their role in the**  
629 **development and evolution of flowering plants.** *Molecular phylogenetics and*  
630 *evolution* 2003, **29**:464-489.
- 631 52. Nesi N, Debeaujon I, Jond C, Stewart AJ, Jenkins GI, Caboche M, Lepiniec L: **The**  
632 **TRANSPARENT TESTA16 locus encodes the ARABIDOPSIS BSISTER MADS domain**  
633 **protein and is required for proper development and pigmentation of the seed coat.**  
634 *The Plant Cell* 2002, **14**:2463-2479.
- 635 53. Mizzotti C, Mendes MA, Caporali E, Schnittger A, Kater MM, Battaglia R, Colombo L:  
636 **The MADS box genes SEEDSTICK and ARABIDOPSIS Bsister play a maternal role in**  
637 **fertilization and seed development.** *The Plant Journal* 2012, **70**:409-420.
- 638 54. Puig J, Meynard D, Khong GN, Pauluzzi G, Guiderdoni E, Gantet P: **Analysis of the**  
639 **expression of the AGL17-like clade of MADS-box transcription factors in rice.** *Gene*  
640 *Expression Patterns* 2013, **13**:160-170.
- 641 55. Schilling S, Pan S, Kennedy A, Melzer R: **MADS-box genes and crop domestication:**  
642 **the jack of all traits.** Oxford University Press UK; 2018.
- 643 56. Theißen G, Melzer R, Rümpler F: **MADS-domain transcription factors and the floral**  
644 **quartet model of flower development: linking plant development and evolution.**  
645 *Development* 2016, **143**:3259-3271.
- 646 57. Immink RG, Kaufmann K, Angenent GC: **The 'ABC' of MADS domain protein**  
647 **behaviour and interactions.** *Semin Cell Dev Biol* 2010, **21**:87-93.
- 648 58. Immink RG, Tonaco IA, de Folter S, Shchennikova A, van Dijk AD, Busscher-Lange J,  
649 Borst JW, Angenent GC: **SEPALATA3: the 'glue' for MADS box transcription factor**  
650 **complex formation.** *Genome Biol* 2009, **10**:R24.
- 651 59. Birchler JA, Riddle NC, Auger DL, Veitia RA: **Dosage balance in gene regulation:**  
652 **biological implications.** *Trends in Genetics* 2005, **21**:219-226.
- 653 60. Borrill P, Harrington SA, Uauy C: **Genome-wide sequence and expression analysis of**  
654 **the NAC transcription factor family in polyploid wheat.** *G3: Genes, Genomes,*  
655 *Genetics* 2017, **7**:3019-3029.
- 656 61. Lee JH, Yoo SJ, Park SH, Hwang I, Lee JS, Ahn JH: **Role of SVP in the control of**  
657 **flowering time by ambient temperature in Arabidopsis.** *Genes & development* 2007,  
658 **21**:397-402.
- 659 62. Moon J, Suh SS, Lee H, Choi KR, Hong CB, Paek NC, Kim SG, Lee I: **The SOC1 MADS -**  
660 **box gene integrates vernalization and gibberellin signals for flowering in**  
661 **Arabidopsis.** *The Plant Journal* 2003, **35**:613-623.
- 662 63. Theißen G, Rümpler F, Gramzow L: **Array of MADS-Box Genes: Facilitator for Rapid**  
663 **Adaptation?** *Trends in plant science* 2018.
- 664 64. Yin L-L, Xue H-W: **The MADS29 transcription factor regulates the degradation of the**  
665 **nucellus and the nucellar projection during rice seed development.** *The Plant Cell*  
666 2012, **24**:1049-1065.

- 667 65. Dubin MJ, Scheid OM, Becker C: **Transposons: a blessing curse.** *Current opinion in*  
668 *plant biology* 2018, **42**:23-29.
- 669 66. Guo S, Xu Y, Liu H, Mao Z, Zhang C, Ma Y, Zhang Q, Meng Z, Chong K: **The interaction**  
670 **between OsMADS57 and OsTB1 modulates rice tillering via DWARF14.** *Nature*  
671 *communications* 2013, **4**:1566.
- 672 67. Xu N, Chu Y, Chen H, Li X, Wu Q, Jin L, Wang G, Huang J: **Rice transcription factor**  
673 **OsMADS25 modulates root growth and confers salinity tolerance via the ABA-**  
674 **mediated regulatory pathway and ROS scavenging.** *PLOS Genetics* 2018,  
675 **14**:e1007662.
- 676 68. Kutter C, Schöb H, Stadler M, Meins F, Si-Ammour A: **MicroRNA-mediated regulation**  
677 **of stomatal development in Arabidopsis.** *Plant Cell* 2007, **19**.
- 678 69. Hu J-Y, Zhou Y, He F, Dong X, Liu L-Y, Coupland G: **miR824-Regulated AGAMOUS-**  
679 **LIKE16 Contributes to Flowering Time Repression in Arabidopsis.** *Plant Cell* 2014,  
680 **26**.
- 681 70. Glover NM, Daron J, Pingault L, Vandepoele K, Paux E, Feuillet C, Choulet F: **Small-**  
682 **scale gene duplications played a major role in the recent evolution of wheat**  
683 **chromosome 3B.** *Genome Biol* 2015, **16**:188.
- 684 71. Shitsukawa N, Tahira C, Kassai K-i, Hirabayashi C, Shimizu T, Takumi S, Mochida K,  
685 Kawaura K, Ogihara Y, Murai K: **Genetic and epigenetic alteration among three**  
686 **homoeologous genes of a class E MADS box gene in hexaploid wheat.** *The Plant Cell*  
687 2007, **19**:1723-1737.
- 688 72. Jones S: **An overview of the basic helix-loop-helix proteins.** *Genome biology* 2004,  
689 **5**:226.
- 690 73. Ledent V, Vervoort M: **The basic helix-loop-helix protein family: comparative**  
691 **genomics and phylogenetic analysis.** *Genome research* 2001, **11**:754-770.
- 692 74. Clavijo BJ, Venturini L, Schudoma C, Accinelli GG, Kaithakottil G, Wright J, Borrill P,  
693 Kettleborough G, Heavens D, Chapman H, et al: **An improved assembly and**  
694 **annotation of the allohexaploid wheat genome identifies complete families of**  
695 **agronomic genes and provides genomic evidence for chromosomal translocations.**  
696 *Genome Research* 2017, **27**:885-896.
- 697 75. El-Gebali S, Mistry J, Bateman A, Eddy SR, Luciani A, Potter SC, Qureshi M,  
698 Richardson LJ, Salazar GA, Smart A: **The Pfam protein families database in 2019.**  
699 *Nucleic Acids Res* 2018, **47**:D427-D432.
- 700 76. Katoh K, Standley DM: **MAFFT multiple sequence alignment software version 7:**  
701 **Improvements in performance and usability.** *Molecular Biology and Evolution* 2013,  
702 **30**:772-780.
- 703 77. Katoh K, Rozewicki J, Yamada KD: **MAFFT online service: multiple sequence**  
704 **alignment, interactive sequence choice and visualization.** *Briefings in Bioinformatics*  
705 2017.
- 706 78. Kalyanamoorthy S, Minh BQ, Wong TKF, von Haeseler A, Jermiin LS: **ModelFinder:**  
707 **fast model selection for accurate phylogenetic estimates.** *Nature Methods* 2017,  
708 **14**:587.
- 709 79. Nguyen L-T, Schmidt HA, von Haeseler A, Minh BQ: **IQ-TREE: a fast and effective**  
710 **stochastic algorithm for estimating maximum-likelihood phylogenies.** *Molecular*  
711 *biology and evolution* 2014, **32**:268-274.



- 712 80. Marchler-Bauer A, Bryant SH: **CD-Search: protein domain annotations on the fly.**  
713 *Nucleic Acids Res* 2004, **32**:W327-W331.
- 714 81. Marchler-Bauer A, Lu S, Anderson JB, Chitsaz F, Derbyshire MK, DeWeese-Scott C,  
715 Fong JH, Geer LY, Geer RC, Gonzales NR: **CDD: a Conserved Domain Database for the**  
716 **functional annotation of proteins.** *Nucleic Acids Res* 2010, **39**:D225-D229.
- 717 82. Marchler-Bauer A, Derbyshire MK, Gonzales NR, Lu S, Chitsaz F, Geer LY, Geer RC, He  
718 J, Gwadz M, Hurwitz DI: **CDD: NCBI's conserved domain database.** *Nucleic Acids Res*  
719 2014, **43**:D222-D226.
- 720 83. Marchler-Bauer A, Bo Y, Han L, He J, Lanczycki CJ, Lu S, Chitsaz F, Derbyshire MK,  
721 Geer RC, Gonzales NR: **CDD/SPARCLE: functional classification of proteins via**  
722 **subfamily domain architectures.** *Nucleic Acids Res* 2016, **45**:D200-D203.
- 723 84. Solovyev V, Kosarev P, Seledsov I, Vorobyev D: **Automatic annotation of eukaryotic**  
724 **genes, pseudogenes and promoters.** *Genome Biol* 2006, **7**:S10.
- 725 85. Alaux M, Rogers J, Letellier T, Flores R, Alfama F, Pommier C, Mohellibi N, Durand S,  
726 Kimmel E, Michotey C: **Linking the International Wheat Genome Sequencing**  
727 **Consortium bread wheat reference genome sequence to wheat genetic and**  
728 **phenomic data.** *Genome Biol* 2018, **19**:111.
- 729 86. Jermiin L: **Homo version 1.3.** CSIRO: CSIRO; 2017.
- 730 87. Wong TKK, Subha; Meusemann, Karen; Yeates, David; Misof, Bernhard; Jermiin, Lars:  
731 **AliStat version 1.3. v1. CSIRO.** In *Software Collection*; 2014.
- 732 88. Hoang DT, Chernomor O, von Haeseler A, Minh BQ, Vinh LS: **UFBoot2: Improving the**  
733 **Ultrafast Bootstrap Approximation.** *Molecular Biology and Evolution* 2018, **35**:518-  
734 522.
- 735 89. Minh BQ, Nguyen MAT, von Haeseler A: **Ultrafast approximation for phylogenetic**  
736 **bootstrap.** *Molecular biology and evolution* 2013, **30**:1188-1195.
- 737 90. Guindon S, Dufayard JF, Lefort V, Anisimova M, Hordjik W, Gascuel O: **New**  
738 **Algorithms and Methods to Estimate Maximum-Likelihood Phylogenies: Assessing**  
739 **the Performance of PhyML 3.0.** *Syst Biol* 2010, **59**.
- 740 91. Babicki S, Arndt D, Marcu A, Liang Y, Grant JR, Maciejewski A, Wishart DS:  
741 **Heatmapper: web-enabled heat mapping for all.** *Nucleic Acids Res* 2016, **44**:W147-  
742 W153.
- 743 92. Yu Y, Ouyang Y, Yao W: **shinyCircos: an R/Shiny application for interactive creation**  
744 **of Circos plot.** *Bioinformatics* 2017, **34**:1229-1231.
- 745 93. Schweiger W, Steiner B, Vautrin S, Nussbaumer T, Siegwart G, Zamini M,  
746 Jungreithmeier F, Gratl V, Lemmens M, Mayer K: **Suppressed recombination and**  
747 **unique candidate genes in the divergent haplotype encoding Fhb1, a major**  
748 **Fusarium head blight resistance locus in wheat.** *Theoretical and Applied Genetics*  
749 2016, **129**:1607-1623.
- 750 94. Liu Z, Xin M, Qin J, Peng H, Ni Z, Yao Y, Sun Q: **Temporal transcriptome profiling**  
751 **reveals expression partitioning of homeologous genes contributing to heat and**  
752 **drought acclimation in wheat (Triticum aestivum L.).** *BMC plant biology* 2015,  
753 **15**:152.
- 754 95. Dobon A, Bunting DC, Cabrera-Quio LE, Uauy C, Saunders DG: **The host-pathogen**  
755 **interaction between wheat and yellow rust induces temporally coordinated waves**  
756 **of gene expression.** *BMC genomics* 2016, **17**:380.

- 757 96. Kugler KG, Siegwart G, Nussbaumer T, Ametz C, Spannagl M, Steiner B, Lemmens M,  
758 Mayer KF, Buerstmayr H, Schweiger W: **Quantitative trait loci-dependent analysis of**  
759 **a gene co-expression network associated with Fusarium head blight resistance in**  
760 **bread wheat (*Triticum aestivum* L.).** *BMC genomics* 2013, **14**:728.
- 761 97. Pingault L, Choulet F, Alberti A, Glover N, Wincker P, Feuillet C, Paux E: **Deep**  
762 **transcriptome sequencing provides new insights into the structural and functional**  
763 **organization of the wheat genome.** *Genome biology* 2015, **16**:29.

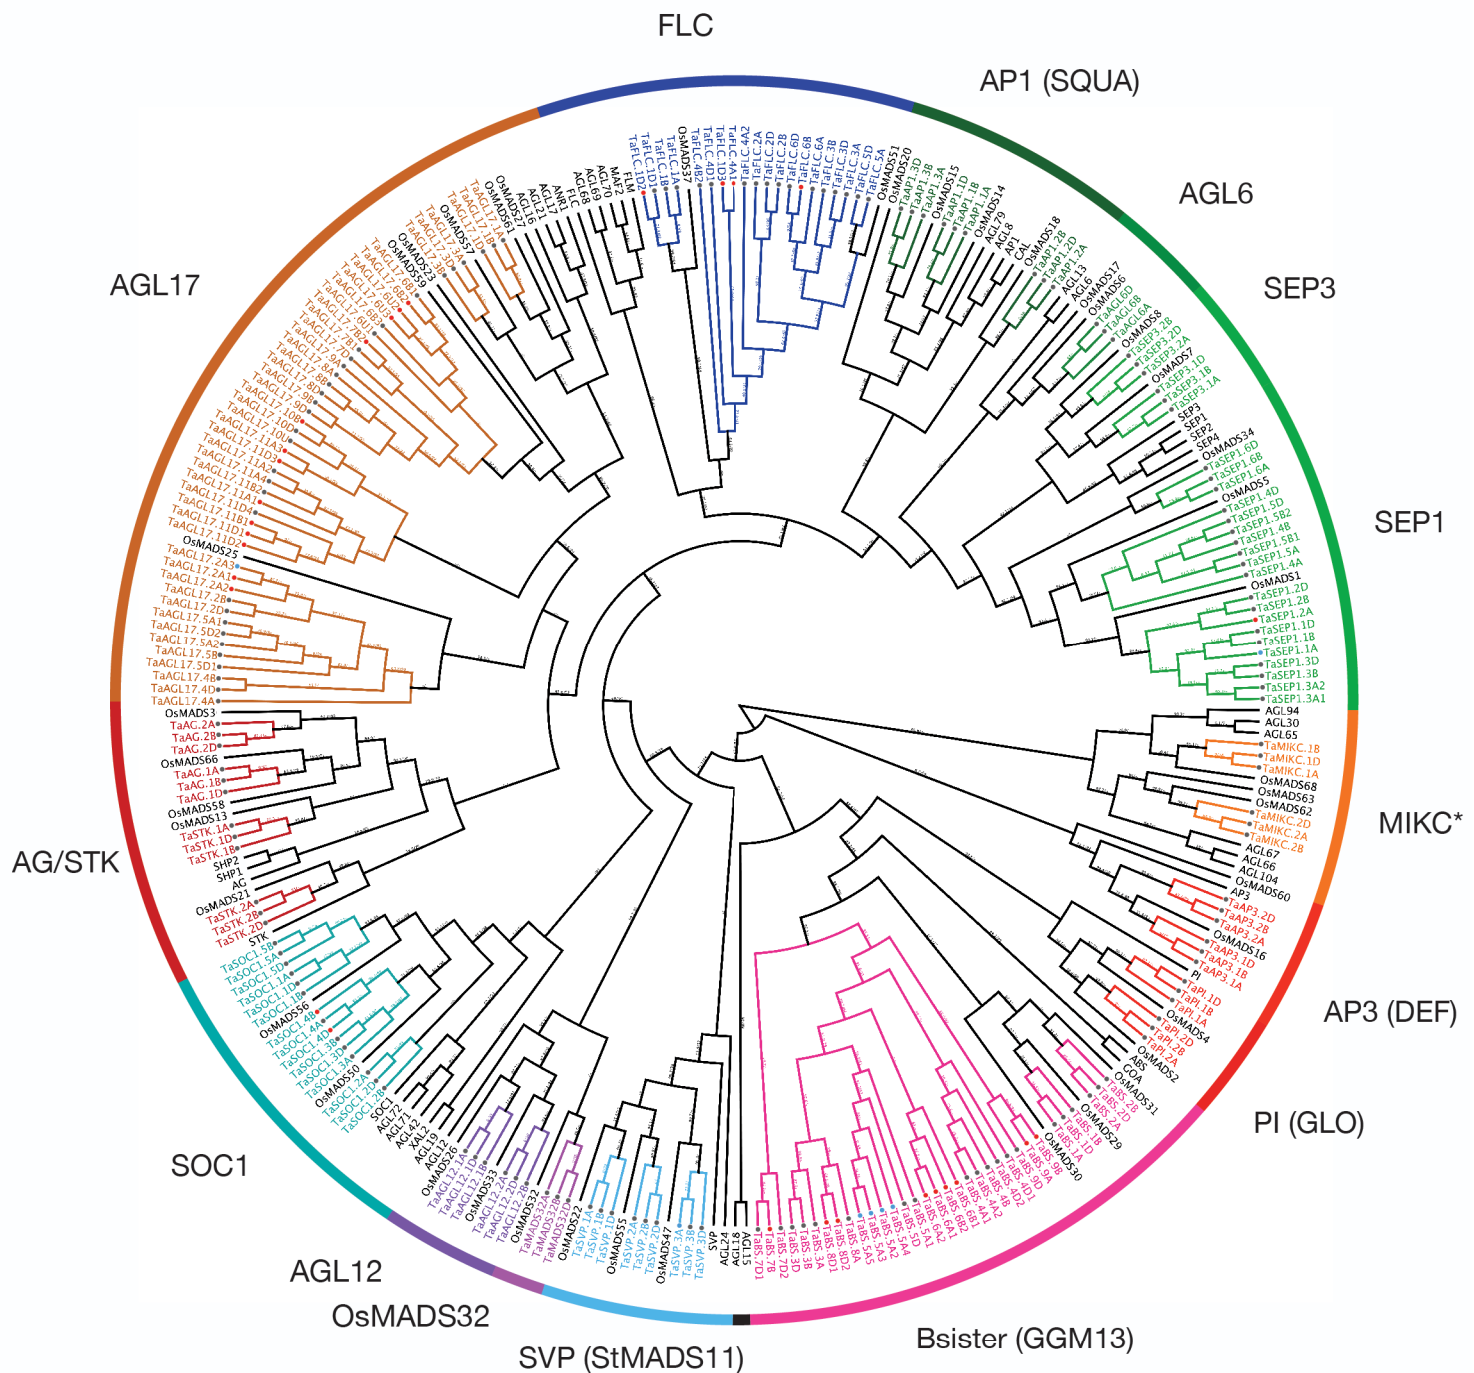

**Figure 1. Maximum likelihood phylogeny of MIKC-type MADS-domain proteins from bread wheat, rice and Arabidopsis.** A phylogenetic tree of MADS-domain proteins from bread wheat, cultivated rice and Arabidopsis was inferred using IQ-TREE [78, 79]. Wheat genes are coloured, rice and Arabidopsis genes are in black. The Arabidopsis genes *AGL15* and *AGL18* were included in the phylogeny; however, the *AGL15*-subfamily is lost in the grass lineage [40], therefore no rice or wheat gene clustered with them. *OsMADS32*-like genes are monocot specific [40], hence in this clade there is no Arabidopsis gene. SH-aLRT and Ultrafast bootstrap values are indicated on the branches in %, values equal to 100 are designated by a -. Accession numbers of all wheat genes can be found in Table S2, a version of the tree with untransformed branches can be found in Figure S2. The tree is unrooted, the MIKC\* subclade was set as the outgroup.

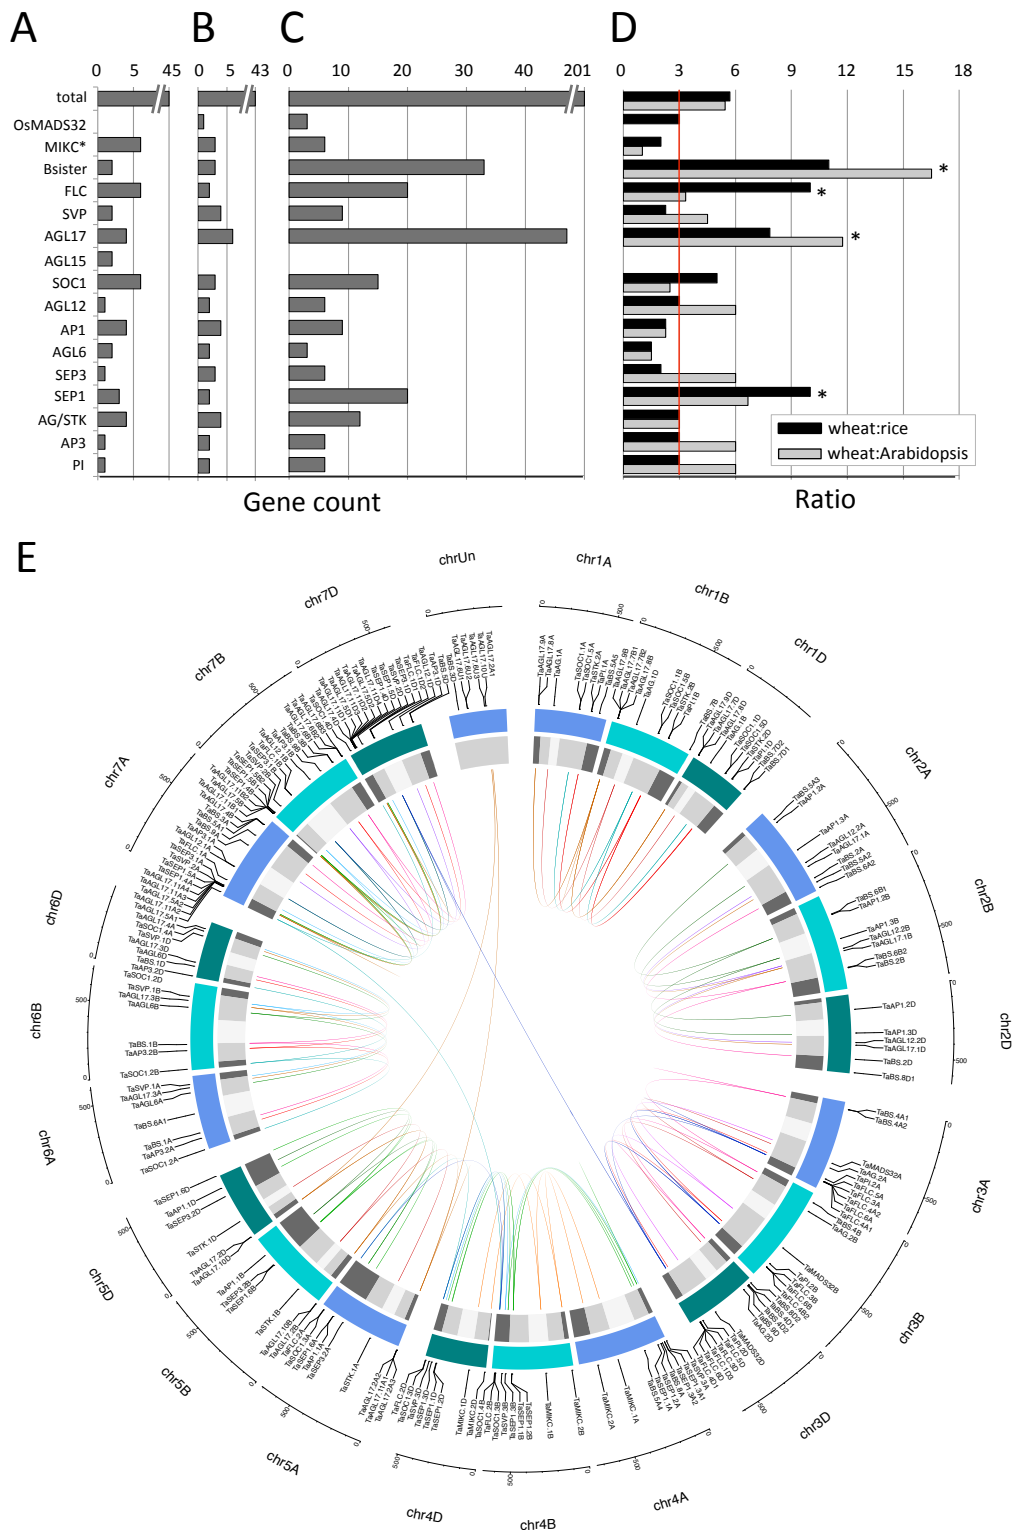

**Figure 2. Number and location of MIKC-type genes.** The number of MADS-box genes identified per MIKC-type subfamily in Arabidopsis (A), rice (B) and wheat (C) [21, 24]. The ratio of MIKC-type gene numbers total and in all subfamilies is shown for wheat to rice (black) and wheat to Arabidopsis (grey) (D). In (D) the expected ratio (3:1) is indicated by a red line, asterisks mark significant deviation from expected value ( $\chi^2$  test,  $p < 0.05$ ).

All MIKC-type MADS-box genes were mapped to their respective locus in the wheat genome in a circular diagram using shinyCircos [92] (E). Subgenomes are indicated by different shades of blue (outer track), chromosomal segments are indicated by shades of grey (inner track) [7]. Homoeologous genes were inferred by mainly by phylogeny (details see Methods) and linked with subfamily-specific colors (inside of circle).

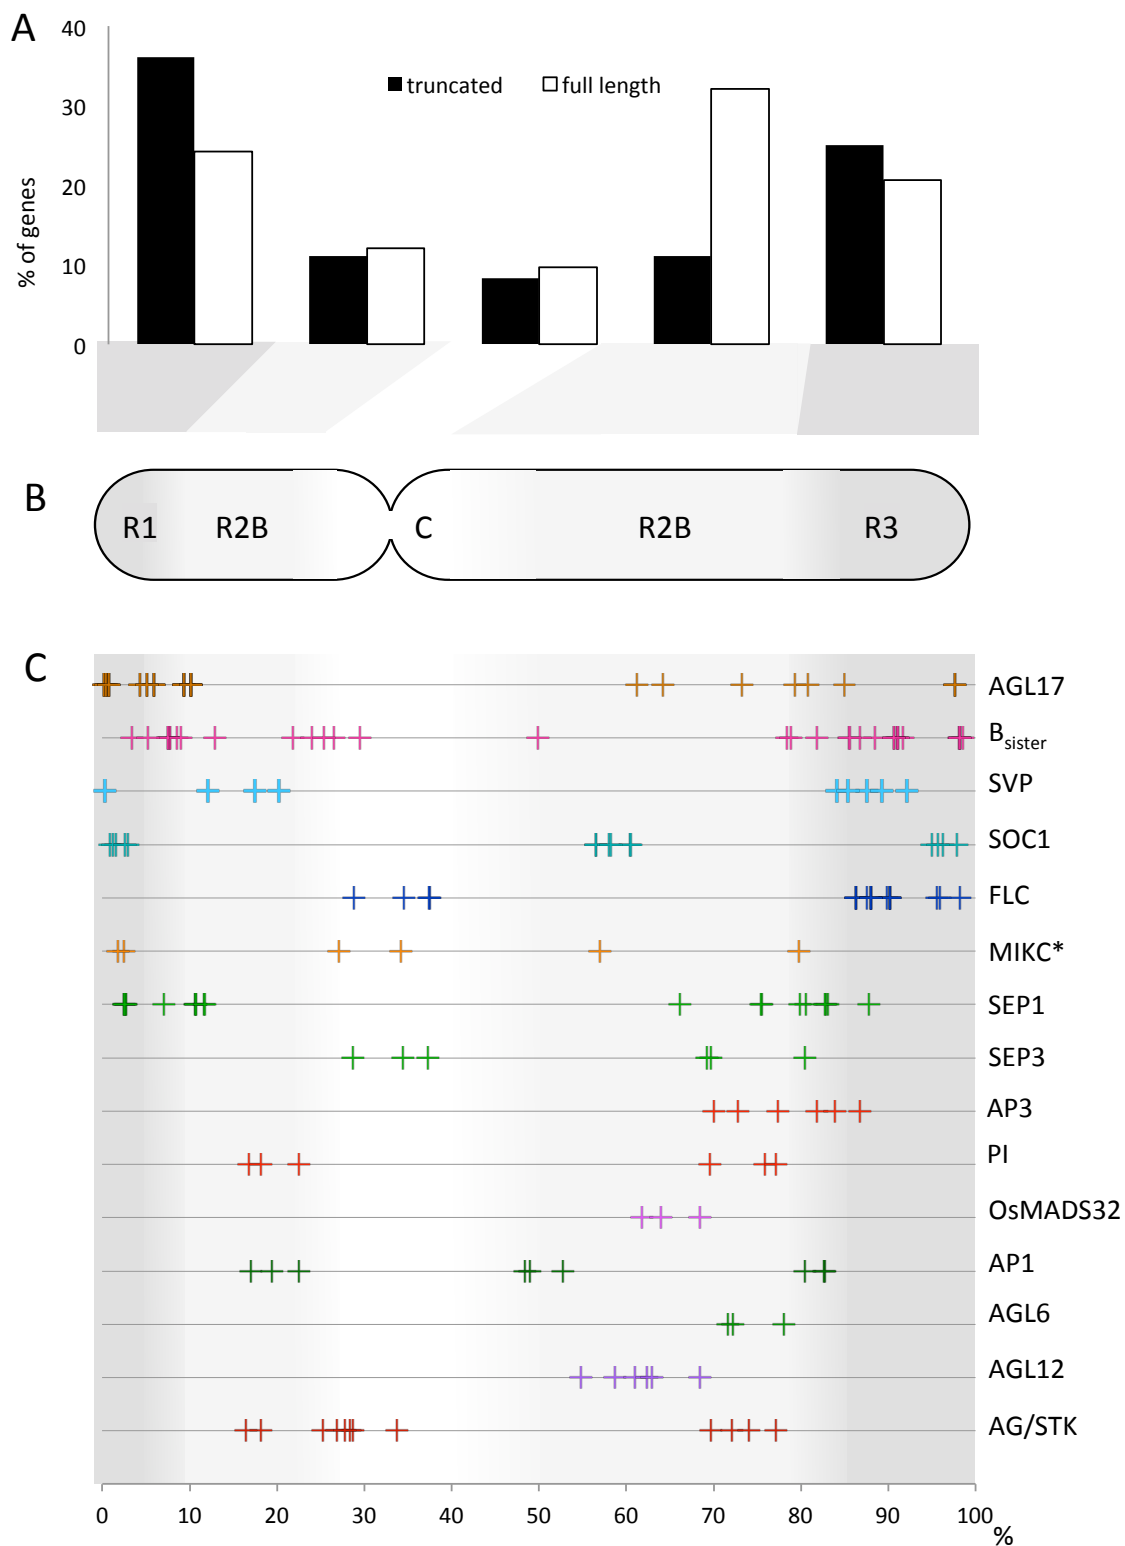

**Figure 3. Chromosomal distribution of wheat MIKC-type MADS-box genes.** The proportion of truncated (black) and full-length (white) MIKC-type genes in every chromosome segment is shown in a bar diagram (A). A schematic overview of the chromosome indicates the different segments, R1 and R3 (dark grey), R2A and R2B (light grey) and C (white) (B). The location of all genes belonging to each MIKC-type subfamily is shown as percentage of chromosome length (C). Segments have been averaged over all chromosomes, segment lengths according to [7].

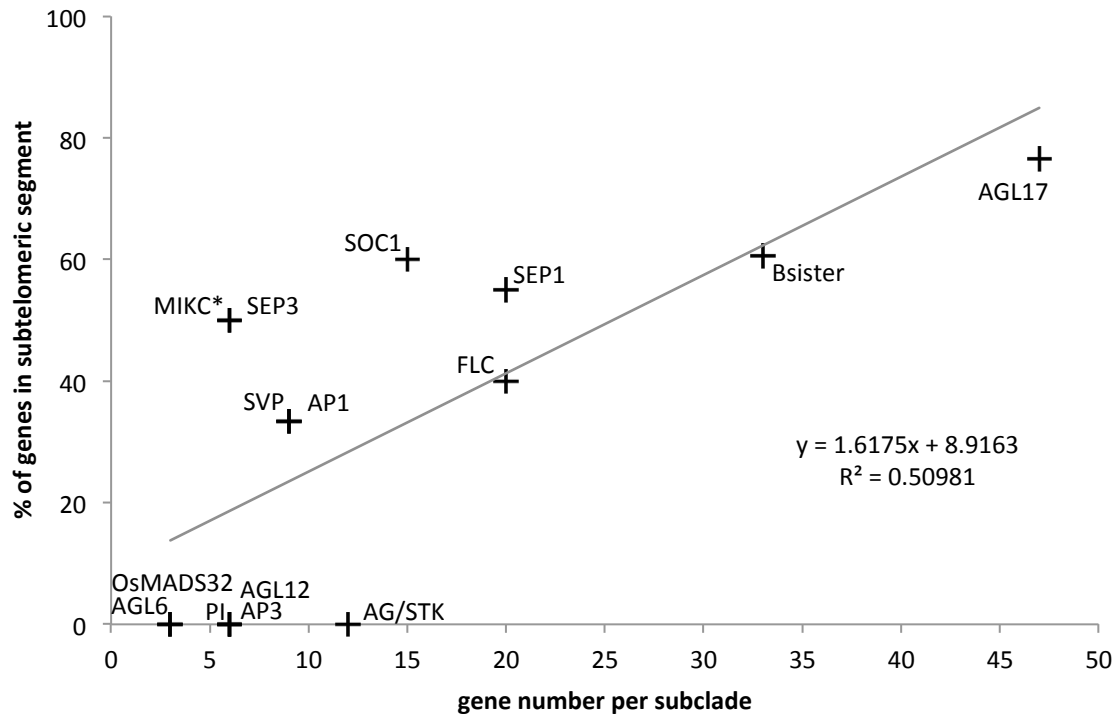

**Figure 4. Distribution of MIKC-type genes to subtelomeric or central chromosome segments.** The number of genes per MIKC-type subclade was plotted against the fraction of genes located in central chromosome segments (R2a, R2b and C) and subtelomeric segments (R1 and R3). Subclades are indicated next to data points. Data points for some subfamilies are identical (*AGL6* and *OsMADS32*; *SVP* and *AP1*; *PI*, *AP3* and *AGL12*; *SEP3* and *MIKC\**).

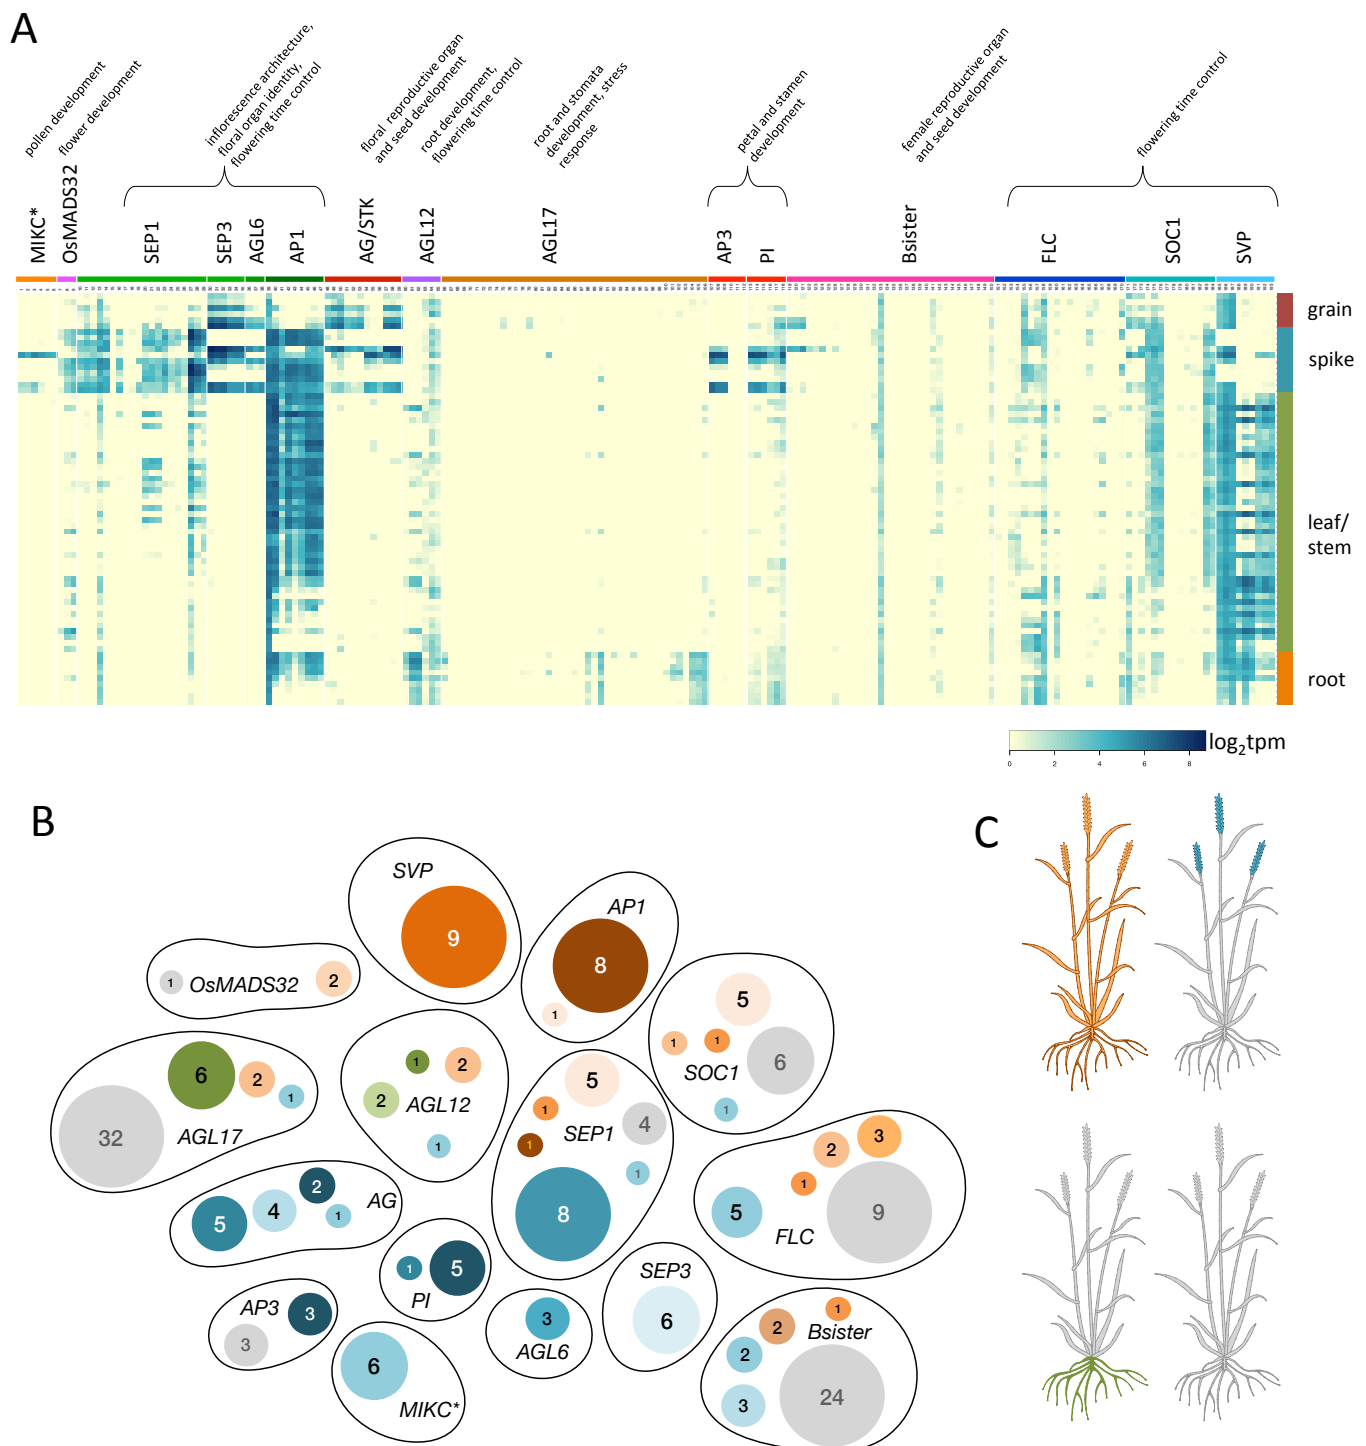

**Figure 5. Expression of MIKC-type MADS-box genes during wheat development.** Expression analysis was done for all subfamilies using RNA-seq data [8]. A heatmap shows expression level of all genes in different subfamilies (columns) and stages/tissues (rows) (A). Genes and tissues are listed in Tables S6 and S7, respectively.

Genes were clustered into different modules according to their expression and mapped to subfamilies. Colors indicate different modules: shades of brown indicate ubiquitous expression, shades of green indicate expression in the root, shades of blue indicate expression in reproductive organs and grey indicates low or no expression during development (B). The digits inside the circles indicate the number of genes in the respective module. The clustering heatmap with all modules can be found in Figure S4. A schematic representation of a wheat plant depicts colors indicating different expression modules (C).

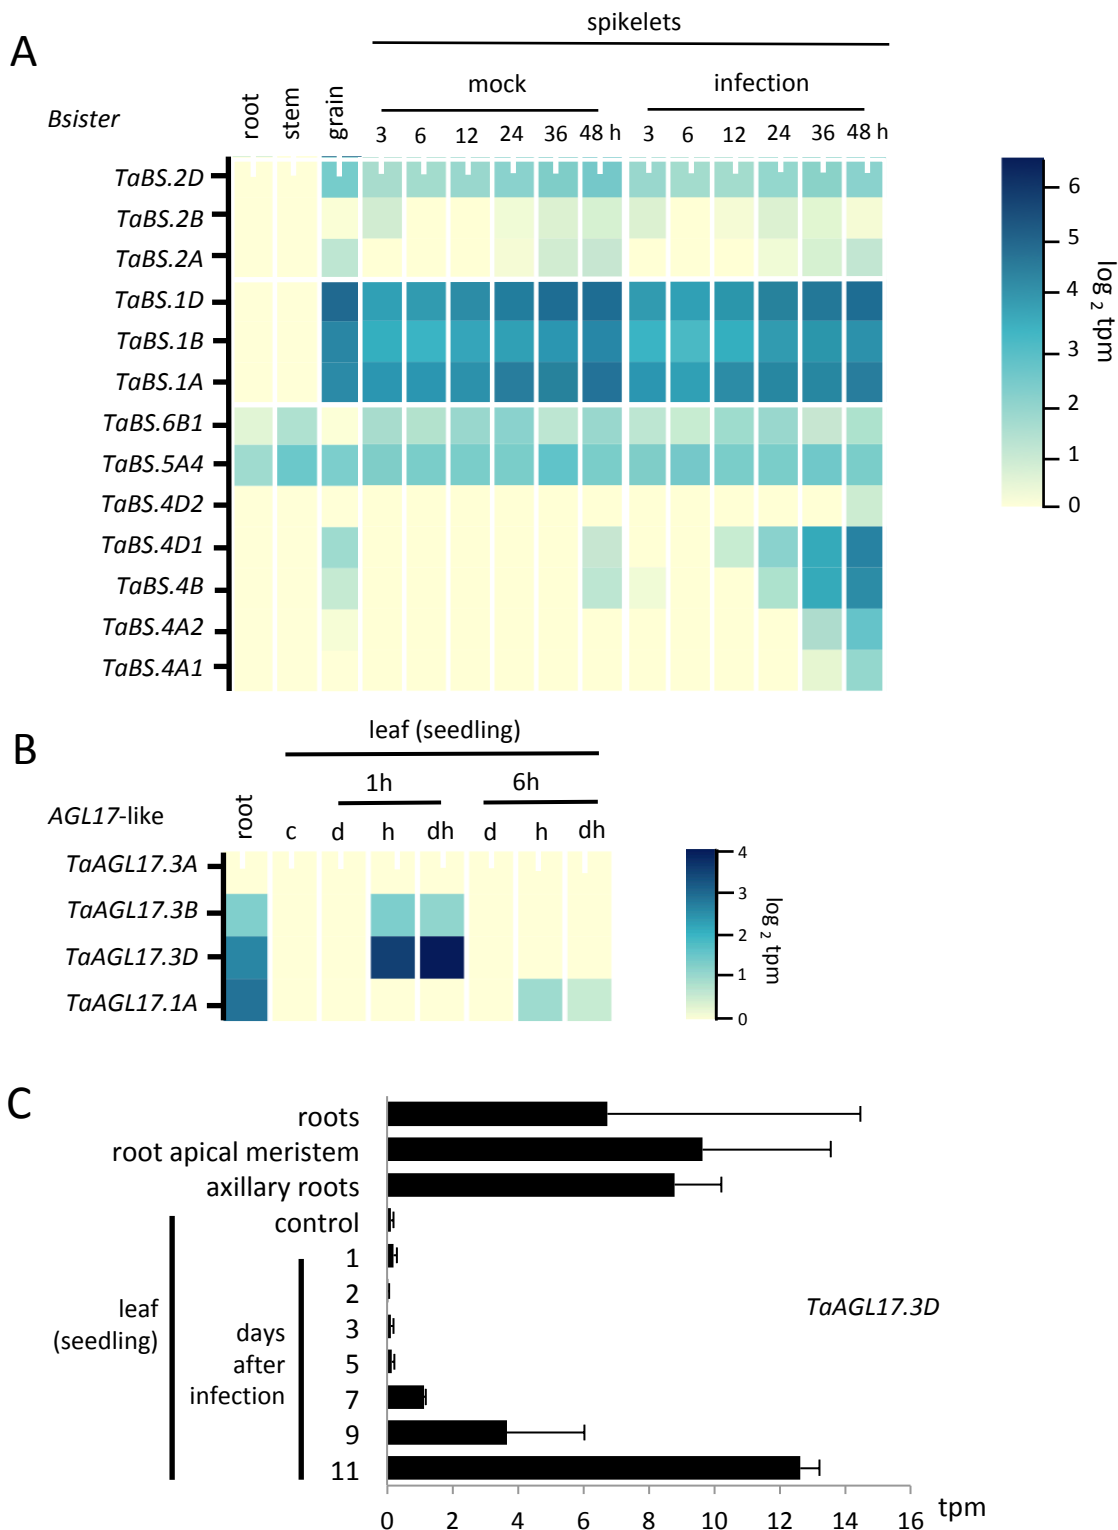

**Figure 6. Expression of *Bsister* and *AGL17*-like genes in response to stress conditions.** RNA-seq data was analyzed using wheatexpression.com [47]. *Bsister* gene expression in different tissues [8] and in response to infection with *Fusarium* head blight [93] (A). Expression of wheat *OsMADS31*-like genes (*TaBS.2*) *OsMADS29*-like genes (*TaBS.1*) and *OsMADS30*-like genes (*TaBS.4*, *TaBS.5A4*, *TaBS.6B1*) in root, stem and grain [8] as well as spikelets during mock inoculation and infection with *Fusarium graminearum* after different time points is shown as a heatmap.

*AGL17*-like gene (1-4) expression in roots and seedling leaves under control conditions (c) and after 1 and 6 hours of drought (d), heat (h) and combined drought and heat stress (dh) [94] (B).

Expression of *TaAGL17.3D* within different root tissues [8] and in leaves under control conditions and after infection with stripe rust (*Puccinia striiformis*) [95] is shown as a bar diagram. SEM is indicated as error bars. Data is shown as  $\log_2$ tpm (A, B) or as tpm (C).



**Table 1. Subfamilies, names and numbers of wheat MIKC-type MADS-box genes.**  
A complete list of all wheat MIKC-type genes can be found in Table S2.

| MIKC-type subclade | homoeolog names | rice homolog      | gene number    |       |             |                | gene location         | Named by             | Alternative gene names from previous publications <sup>6</sup> | Reference Alt Name                            |
|--------------------|-----------------|-------------------|----------------|-------|-------------|----------------|-----------------------|----------------------|----------------------------------------------------------------|-----------------------------------------------|
|                    |                 |                   | x <sup>1</sup> | total | full length | M <sup>2</sup> |                       |                      |                                                                |                                               |
| MIKC*              | TaMIKC*1        | OsMADS68          | 3              | 3     | 0           | 0              | 4 ABD                 | this study           | -                                                              | -                                             |
|                    | TaMIKC*2        | OsMADS63/OsMADS62 | 3              | 3     | 0           | 0              | 4 ABD                 | this study           | -                                                              | -                                             |
| OsMADS32           | TaMADS32        | OsMADS32          | 3              | 3     | 0           | 0              | 3 ABD                 | this study           | TaWM16                                                         | Paolacci et al. 2007                          |
| AGL12              | TaAGL12.1       | OsMADS26          | 3              | 3     | 0           | 0              | 7 ABD                 | Paolacci et al. 2007 | TaAGL32                                                        | Zhao T et al. 2006                            |
|                    | TaAGL12.2       | OsMADS33          | 3              | 3     | 0           | 0              | 2 ABD                 | this study           | -                                                              | -                                             |
| API (SQUA)         | TaAP1.1         | OsMADS14          | 3              | 3     | 0           | 0              | 5 ABD                 | Paolacci et al. 2007 | VRN1; TaVRT-1                                                  | Yan et al. 2003, Fu et al. 2005; Danyluk 2003 |
|                    | TaAP1.2         | OsMADS18/OsMADS20 | 3              | 3     | 0           | 0              | 2 ABD                 | Paolacci et al. 2007 | -                                                              | -                                             |
|                    | TaAP1.3         | OsMADS15          | 3              | 3     | 0           | 0              | 2 ABD                 | Paolacci et al. 2007 | FUL2                                                           | Li et al. 2019                                |
| SVP (S/MADS11)     | TaSVP.1         | OsMADS22          | 3              | 3     | 0           | 0              | 6 ABD                 | Paolacci et al. 2007 | -                                                              | -                                             |
|                    | TaSVP.2         | OsMADS55          | 3              | 3     | 0           | 0              | 7 ABD                 | Paolacci et al. 2007 | TaVRT-2                                                        | Kane et al. 2005                              |
|                    | TaSVP.3         | OsMADS47          | 3              | 2     | 0           | 1              | 4 (A)BD               | Paolacci et al. 2007 | -                                                              | -                                             |
| SEP1               | TaSEP1.1        |                   | 3              | 2     | 0           | 1              | 4 (A)BD               | this study           | TaSEP-1                                                        | Paolacci et al. 2007                          |
|                    | TaSEP1.2        | OsMADS1           | 3              | 2     | 1           | 0              | 4 (A)BD               | this study           | WLHS1; TaSEP-2                                                 | Shitsukawa et al. 2007; Paolacci et al. 2007  |
|                    | TaSEP1.3        |                   | 4              | 4     | 0           | 0              | 4 AABD                | this study           | -                                                              | -                                             |
|                    | TaSEP1.4        |                   | 3              | 3     | 0           | 0              | 7 ABD                 | this study           | TaSEP-6                                                        | Paolacci et al. 2007                          |
|                    | TaSEP1.5        | OsMADS5           | 4              | 4     | 0           | 0              | 7 AABD                | this study           | -                                                              | -                                             |
|                    | TaSEP1.6        | OsMADS34          | 3              | 3     | 0           | 0              | 5 ABD                 | this study           | TaSEP-5                                                        | Paolacci et al. 2007                          |
| SEP3               | TaSEP3.1        | OsMADS7/45        | 3              | 3     | 0           | 0              | 7 ABD                 | this study           | WSEP; TaSEP-4                                                  | Shitsukawa et al. 2007; Paolacci et al. 2007  |
|                    | TaSEP3.2        | OsMADS8/24        | 3              | 3     | 0           | 0              | 5 ABD                 | this study           | TaMADS1; TaSEP-3                                               | Zhao XY et al. 2006; Paolacci et al. 2007     |
| AGL6               | TaAGL6          | OsMADS6/OsMADS17  | 3              | 3     | 0           | 0              | 6 ABD                 | this study           | TaMADS#12                                                      | Murai et al. 1998                             |
| AG/STK             | TaAG.1          | OsMADS58/OsMADS66 | 3              | 3     | 0           | 0              | 1 ABD                 | Paolacci et al. 2007 | WAG-1                                                          | Hirabayashi and Murai 2009                    |
|                    | TaAG.2          | OsMADS3           | 3              | 3     | 0           | 0              | 3 ABD                 | Paolacci et al. 2007 | WAG-2                                                          | Hirabayashi and Murai 2009                    |
|                    | TaSTK.1         | OsMADS13          | 3              | 3     | 0           | 0              | 5 ABD                 | this study           | TaAG-3; WSTK                                                   | Paolacci et al. 2007; Yamada et al. 2009      |
|                    | TaSTK.2         | OsMADS21          | 3              | 3     | 0           | 0              | 1 ABD                 | this study           | TaAG-4                                                         | Paolacci et al. 2007                          |
| SOC1 (TM3)         | TaSOC1.1        | OsMADS56          | 3              | 3     | 0           | 0              | 1 ABD                 | Paolacci et al. 2007 | -                                                              | -                                             |
|                    | TaSOC1.5        |                   | 3              | 3     | 0           | 0              | 1 ABD                 | this study           | -                                                              | -                                             |
|                    | TaSOC1.3        | OsMADS50          | 3              | 3     | 0           | 0              | 4(5) ABD              | Paolacci et al. 2007 | WSOC1                                                          | Shitsukawa et al. 2007                        |
|                    | TaSOC1.4        |                   | 3              | 1     | 2           | 0              | 7(4) A(BD)            | this study           | -                                                              | -                                             |
|                    | TaSOC1.2        | -                 | 3              | 3     | 0           | 0              | 6 ABD                 | Paolacci et al. 2007 | -                                                              | -                                             |
| AP3 (DEF)          | TaAP3.1         | OsMADS16          | 3              | 3     | 0           | 0              | 7 ABD                 | this study           | WAP3                                                           | Hama 2004                                     |
|                    | TaAP3.2         |                   | 3              | 3     | 0           | 0              | 6 ABD                 | this study           | -                                                              | -                                             |
| PI (GLO)           | TaPI.1          | OsMADS4           | 3              | 3     | 0           | 0              | 1 ABD                 | this study           | WPI-1                                                          | Hama 2004                                     |
|                    | TaPI.2          | OsMADS2           | 3              | 3     | 0           | 0              | 3 ABD                 | this study           | WPI-2                                                          | Hama 2004                                     |
| ABS (GGM13)        | TaBS.1          | OsMADS29          | 3              | 3     | 0           | 0              | 6 ABD                 | this study           | TaGGM13; WBSIS                                                 | Paolacci et al. 2007; Yamada et al. 2009      |
|                    | TaBS.2          | OsMADS31          | 3              | 3     | 0           | 0              | 2 ABD                 | this study           | -                                                              | -                                             |
|                    | TaBS.3          |                   | 3              | 3     | 0           | 0              | 7 ABD                 | this study           | -                                                              | -                                             |
|                    | TaBS.4          |                   | 5              | 5     | 0           | 0              | 3 AABDD               | this study           | -                                                              | -                                             |
|                    | TaBS.5          | *                 | 6              | 2     | 0           | 4              | x A(AAAA)D            | this study           | -                                                              | -                                             |
|                    | TaBS.6          | * OsMADS30        | 4              | 0     | 4           | 0              | 2(6) (AABB)           | this study           | -                                                              | -                                             |
|                    | TaBS.7          | *                 | 3              | 2     | 1           | 0              | 1 (B)DD               | this study           | -                                                              | -                                             |
|                    | TaBS.8          | *                 | 3              | 0     | 3           | 0              | x (ADD)               | this study           | -                                                              | -                                             |
|                    | TaBS.9          | *                 | 3              | 1     | 2           | 0              | 7(3) (AB)D            | this study           | -                                                              | -                                             |
| AGL17              | TaAGL17.1       | OsMADS27/OsMADS61 | 3              | 3     | 0           | 0              | 2 ABD                 | Paolacci et al. 2007 | -                                                              | -                                             |
|                    | TaAGL17.2       |                   | 5              | 2     | 2           | 1              | 5 (AA)BD(U)           | Paolacci et al. 2007 | -                                                              | -                                             |
|                    | TaAGL17.4       | OsMADS25          | 3              | 3     | 0           | 0              | 7 ABD                 | this study           | -                                                              | -                                             |
|                    | TaAGL17.5       |                   | 5              | 5     | 0           | 0              | 7 AABDD               | this study           | -                                                              | -                                             |
|                    | TaAGL17.3       | OsMADS57/OsMADS23 | 3              | 3     | 0           | 0              | 6 ABD                 | Paolacci et al. 2007 | -                                                              | -                                             |
|                    | TaAGL17.6       | *                 | 6              | 3     | 3           | 0              | 7 (B)BBU(UU)          | this study           | -                                                              | -                                             |
|                    | TaAGL17.7       |                   | 3              | 2     | 1           | 0              | 1 (B)BD               | this study           | -                                                              | -                                             |
|                    | TaAGL17.8       | OsMADS59          | 3              | 3     | 0           | 0              | 1 ABD                 | this study           | -                                                              | -                                             |
|                    | TaAGL17.9       |                   | 3              | 3     | 0           | 0              | 1 ABD                 | this study           | -                                                              | -                                             |
|                    | TaAGL17.10      |                   | 3              | 2     | 1           | 0              | 5 (B)DU               | this study           | -                                                              | -                                             |
|                    | TaAGL17.11      | *                 | 10             | 4     | 6           | 0              | 7(5) (AA)AAB(B)D(DDD) | this study           | -                                                              | -                                             |
| FLC                | TaFLC.1         | OsMADS37          | 5              | 3     | 2           | 0              | 7(3) ABD(DD)          | this study           | TaAGL12                                                        | Ruelens et al. 2012                           |
|                    | TaFLC.2         |                   | 3              | 3     | 0           | 0              | 4(5) ABD              | this study           | -                                                              | -                                             |
|                    | TaFLC.3         |                   | 3              | 3     | 0           | 0              | 3 ABD                 | this study           | -                                                              | -                                             |
|                    | TaFLC.4         | OsMADS51          | 4              | 3     | 1           | 0              | 3 (A)ABD(D)           | this study           | TaAGL22, TaAGL33                                               | Appels et al., 2018; Sharma et al. 2017       |
|                    | TaFLC.5         |                   | 2              | 2     | 0           | 0              | 3 AD                  | this study           | -                                                              | -                                             |
|                    | TaFLC.6         | *                 | 3              | 2     | 1           | 0              | 3 A(B)D               | this study           | -                                                              | -                                             |
| total count        |                 |                   | 201            | 164   | 30          | 7              |                       |                      |                                                                |                                               |

<sup>1</sup> asterisk indicates that the number of homeologs could not be determined due to unclear phylogenetic resolution, genes were not included into homoeolog count (Table 2). Details see Figure S2.

<sup>2</sup> gene encodes for MADS but not K domain

<sup>3</sup> gene encodes for K but not MADS domain

<sup>4</sup> number in parentheses indicates a different chromosome for one of the genes; x, genes located on more than two different chromosomes

<sup>5</sup> parentheses indicate truncated genes, encoding for either MADS or K domain

**Table 2. Groups of homoeologous MIKC-type MADS-box genes in wheat.**

| homoeologous group (A:B:D) | all wheat genes <sup>1</sup> | wheat MIKC MADS (all) |            |                      | wheat MIKC MADS (full-length only) |            |                         |
|----------------------------|------------------------------|-----------------------|------------|----------------------|------------------------------------|------------|-------------------------|
|                            |                              | # of groups           | # of genes | % genes <sup>2</sup> | # of groups                        | # of genes | % of genes <sup>3</sup> |
| 1:1:1                      | 35.8%                        | 42                    | 126        | 62.7%                | 40                                 | 120        | 73.2%                   |
| n:1:1/1:n:1/1:1:n          | 5.7%                         | 4                     | 17         | 8.5%                 | 2                                  | 8          | 4.9%                    |
| 1:1:0/1:0:1/0:1:1          | 13.2%                        | 1                     | 2          | 1.0%                 | 6                                  | 12         | 7.3%                    |
| other ratios <sup>4</sup>  | 8.0%                         | 4                     | 18         | 9.0%                 | 3                                  | 10         | 6.1%                    |
| orphans/singletons         | 37.1%                        | 0                     | 0          | 0.0%                 | 1                                  | 1          | 0.6%                    |
| excluded <sup>5</sup>      | -                            | -                     | 38         | 18.9%                | -                                  | 13         | 7.9%                    |
|                            | 99.8%                        |                       | 201        | 100.0%               |                                    | 164        | 100.0%                  |

<sup>1</sup> according to Appels et al., 2018

<sup>2</sup> % calculated with 201 genes

<sup>3</sup> % calculated with 164 genes

<sup>4</sup> either n:1:n or 0:1:n

<sup>5</sup> see Table 1, Figure S2 and Methods
